# Supplementary material for: Enlarging Knowledge on Lager Beer Volatile Metabolites Using Multidimensional Gas Chromatography
Source: Foods. 2020 Sep 11;9(9):1276. doi: 10.3390/foods9091276 (PMC7554861; doi:10.3390/foods9091276)
Supplement: Supplementary file 1 [file foods-09-01276-s001.zip › Table S1 - Full data set used for statistics.xlsx]

## Sheet: Folha1
Table S1. Full data set used for statistics processing including the detected metabolites in lager beers using HS-SPME/GC×GC-ToFMS, with relevant chromatographic data used to assess compounds identification.
	1tR (s)a	2tR (s)a	Compound	Chemical formula	CAS number	MSI level b	RICalc.c	RILitd	Ref. RILit	Compound previously reported on lager beer	P1-1			P1-2			P1-3			P2-1			P2-2			P3-1			P3-2			P4-1			P5-1			P6-1			P7-1			P8-1			P8-2
											Replicate 1	Replicate 2	Replicate 3	Replicate 1	Replicate 2	Replicate 3	Replicate 1	Replicate 2	Replicate 3	Replicate 1	Replicate 2	Replicate 3	Replicate 1	Replicate 2	Replicate 3	Replicate 1	Replicate 2	Replicate 3	Replicate 1	Replicate 2	Replicate 3	Replicate 1	Replicate 2	Replicate 3	Replicate 1	Replicate 2	Replicate 3	Replicate 1	Replicate 2	Replicate 3	Replicate 1	Replicate 2	Replicate 3	Replicate 1	Replicate 2	Replicate 3	Replicate 1	Replicate 2	Replicate 3
			Norisoprenoids
1	504	0.63	2,2,6-Trimethylcyclohexanone	C9H14O	2408-37-9	2	1033.8	1051	[25]	–	561000	257000	316000	557000	509000	386000	428000	509000	374000	vt	vt	vt	881000	727000	776000	487000	245000	74300	569000	511000	450000	584000	346000	216000	476000	401000	228000	373000	410000	401000	1090000	597000	799000	537000	233000	375000	509000	266000	499000
2	540	0.72	3,5,5-Trimethyl-2-cyclohexen-1-one / Isophorone	C9H14O	78-59-1	2	1054.7	1062	[3]		-	-	-	57400	59900	53700	119000	112000	109000	47300	24000	11600	195000	203000	203000	225000	104000	153000	138000	137000	132000	76300	76800	105000	53600	51400	46000	157000	156000	173000	137000	88700	83600	109000	95100	96500	145000	137000	137000
3	744	0.91	Safranal	C10H14O	116-26-7	2	1196.5	1201	[35]	–	1080000	899000	1600000	659000	400000	785000	1060000	529000	581000	934000	676000	671000	1680000	1930000	1400000	598000	784000	1190000	828000	675000	681000	1510000	1310000	1090000	1460000	1330000	1400000	1840000	1930000	1610000	722000	545000	511000	1370000	1550000	1470000	1260000	1290000	1250000
4	774	0.82	β-Cyclocitral	C10H16O	432-25-7	2	1218.8	1225	[35]	–	431000	396000	545000	215000	212000	372000	230000	233000	218000	239000	199000	256000	586000	640000	545000	294000	233000	163000	312000	326000	276000	214000	176000	284000	536000	456000	461000	154000	213000	259000	268000	171000	160000	350000	325000	359000	349000	284000	273000
5	852	0.59	Vitispirane	C13H20O	65416-59-3	2	1277.7	1289	[3]	–	191000	51000	218000	228000	427000	303000	-	55000	-	-	83800	-	338000	321000	381000	122000	93000	100000	232000	260000	138000	421000	365000	352000	509000	371000	278000	210000	474000	362000	133000	204000	62500	1060000	1340000	863000	826000	698000	590000
6	900	0.64	Edulan I	C13H20O	41678-29-9	2	1314.1	1314	[36]	–	329000	359000	418000	421000	371000	232000	80600	69800	107000	139000	148000	255000	650000	527000	269000	143000	189000	110000	143000	189000	650000	1400000	426000	414000	438000	419000	335000	512000	427000	963000	243000	201000	210000	1060000	432000	684000	737000	398000	76900
7	948	0.67	α-Ionene	C13H18	475-03-6	2	1350.5	1354	[37]	–	202000	186000	255000	111000	133000	114000	112000	97600	98600	176000	138000	127000	318000	267000	192000	85900	80000	95700	292000	274000	219000	96300	101000	86800	263000	240000	216000	164000	206000	117000	96300	91000	90500	346000	211000	416000	176000	213000	150000
8	960	0.78	β-Damascenone (isomer)	C13H18O	23726-93-4	2	1359.7	1383	[5]	P [7,9,11,12,31,38,39]	516000	362000	697000	869000	1090000	858000	50700	340000	399000	355000	299000	212000	1700000	550000	1740000	556000	315000	471000	1480000	1610000	2860000	1020000	1400000	982000	1160000	1170000	1150000	1250000	1310000	1230000	1410000	1350000	1300000	1430000	1420000	1360000	1290000	1450000	1820000
9	990	0.84	β-Damascenone (isomer)	C13H18O	23726-93-4	2	1382.5	1383	[5]	P [7,9,11,12,31,38,39]	24100000	21400000	27200000	23800000	24600000	21500000	16200000	16000000	15700000	25000000	20200000	17100000	37400000	44400000	38800000	23400000	20900000	18500000	34700000	35300000	31800000	27800000	28100000	27600000	28900000	29600000	28300000	31000000	29200000	32900000	27900000	28800000	26500000	39900000	39100000	41000000	31300000	29600000	30500000
10	1044	0.81	α-Ionone	C13H20O	127-41-3	2	1425.7	1439	[40]	P [41]	148000	201000	218000	107000	97100	139000	171000	318000	214000	267000	216000	217000	188000	207000	214000	447000	336000	255000	761000	265000	1080000	190000	vt	269000	-	-	-	107000	96000	113000	224000	253000	224000	48300	72700	43300	197000	180000	222000
11	1044	0.86	β-Ionone epoxide	C13H20O2	23267-57-4	2	1425.7	1428	[42]	–	174000	166000	167000	133000	284000	191000	110000	163000	123000	99400	122000	124000	108000	171000	94300	98000	153000	79900	151000	140000	128000	280000	239000	194000	211000	224000	207000	-	-	-	293000	449000	219000	66200	95700	183000	184000	98400	205000
12	1074	0.77	Geranyl acetone	C13H22O2	689-67-8	1	1450.6	1455	[35]	P [12]	30600000	27400000	11700000	7960000	12100000	15500000	12800000	9210000	16000000	18200000	12100000	14100000	9240000	10600000	12000000	11400000	6340000	5930000	24400000	21400000	22200000	19300000	16700000	26800000	10700000	7070000	10800000	7400000	5710000	7570000	21900000	20700000	25500000	34200000	33700000	44500000	15400000	14500000	20200000
13	1110	0.72	α-Isomethyl ionone	C14H22O	127-51-5	2	1480.6	1487	[43]	–	642000	565000	814000	1460000	1390000	1330000	1040000	1140000	1400000	954000	806000	618000	885000	982000	856000	1260000	1030000	766000	909000	811000	692000	1480000	1720000	1520000	263000	184000	243000	649000	700000	781000	1920000	1650000	1370000	611000	541000	386000	1560000	1430000	1390000
14	1116	0.84	β-Ionone	C13H20O	14901-07-6	1	1485.7	1494	[40]	P [38]	430000	310000	356000	vt	460000	483000	297000	279000	275000	308000	333000	268000	149000	226000	234000	253000	224000	249000	104000	158000	110000	267000	342000	522000	225000	315000	267000	197000	320000	434000	571000	547000	616000	440000	221000	420000	388000	500000	621000
15	1116	0.91	β-Ionone 5,6-epoxide	C13H20O2	23267-57-4	2	1480.8	1498	[25]	–	-	-	-	74900	34300	50000	127000	129000	122000	35900	56300	50000	-	-	-	24500	6770	11600	15000	14300	vt	vt	vt	vt	61500	67700	73400	55300	16900	59800	vt	vt	vt	-	-	-	vt	vt	vt
16	1116	0.96	3,4-Dehydro-β-ionone	C13H18O	1203-08-3	2	1485.8	1485.3	[44]	–	391000	221000	322000	476000	375000	317000	415000	482000	574000	228000	195000	171000	312000	341000	284000	-	-	-	110000	176000	148000	225000	418000	196000	494000	445000	451000	237000	245000	204000	287000	255000	240000	416000	274000	263000	233000	247000	291000
			Subtotal (GC Peak Area)								52500000			40800000			33100000			38900000			58200000			32800000			63000000			55800000			44200000			44300000			57000000			84600000			54700000
			Subtotal (%)								0.55			0.61			0.6			0.66			0.92			0.62			0.99			0.89			0.6			0.8			0.74			1.25			0.73
			Esters
			Aliphatics
17	96	0.44	Ethyl acetate	C4H8O2	141-78-6	2	611.3	611	[5]	P[6,11,12,28,38,41,45]	237000000	169000000	220000000	89900000	81800000	75300000	86200000	69600000	88000000	58800000	47000000	34500000	77400000	83500000	133000000	70400000	73500000	59200000	85400000	64500000	76800000	68700000	72800000	59300000	103000000	113000000	104000000	89500000	104000000	96400000	35700000	36200000	26200000	112000000	102000000	95200000	79600000	76500000	62300000
18	138	0.45	Ethyl propanoate	C5H10O2	105-37-3	1	685	696	[5]	P [38]	26900000	27200000	33700000	12000000	10600000	8530000	15500000	16900000	11200000	3290000	2160000	2830000	3910000	3390000	2970000	3100000	2650000	2330000	3350000	2480000	2450000	1950000	1510000	2450000	41700000	36500000	31800000	5850000	5790000	5630000	1140000	734000	vt	8730000	4880000	4740000	4460000	5570000	4980000
19	144	0.45	Propyl acetate	C5H10O2	109-60-4	2	695.53	701	[18]	–	3570000	2190000	2930000	-	-	-	2450000	1330000	2170000	549000	605000	639000	1710000	1430000	1200000	1630000	2410000	2330000	1680000	1620000	1380000	-	-	-	1560000	2970000	3550000	-	-	-	-	-	-	-	-	-	-	-	-
20	174	0.43	Ethyl 2-methylpropanoate	C6H12O2	97-62-1	2	748.12	751	[18]	P [39]	941000	646000	1040000	340000	1110000	199000	225000	vt	272000	145000	103000	226000	1210000	vt	1190000	335000	249000	139000	378000	291000	237000	vt	vt	vt	2150000	1510000	1830000	1040000	1590000	613000	vt	vt	vt	vt	1270000	1090000	442000	410000	154000
21	186	0.48	2-Methylpropyl acetate	C6H12O2	110-19-0	2	769.26	769	[5]	P[6,7,9,12,38,41,45]	31200000	21000000	33900000	16500000	15400000	12700000	16700000	14600000	12600000	12000000	7870000	8390000	17000000	14700000	12500000	21700000	17100000	16800000	45400000	37600000	33700000	8160000	7370000	5140000	43900000	38800000	39000000	16700000	15100000	11700000	5610000	4650000	3770000	27800000	25700000	20300000	13600000	11000000	8060000
22	210	0.5	Ethyl butanoate	C6H12O2	105-54-4	1	805.7	806	[5]	P[6,7,9,11,12,28,31,38,39,41,45]	41500000	30800000	45300000	22900000	21600000	17600000	42400000	37500000	33400000	17300000	18400000	24100000	31500000	27400000	23800000	24100000	18800000	17000000	31200000	25300000	22000000	19000000	14700000	9240000	67600000	54700000	50000000	32800000	30900000	25700000	2850000	4680000	4110000	39200000	34300000	29100000	17800000	15300000	12200000
23	222	0.52	Butyl acetate	C6H12O2	123-86-4	2	816.25	819	[3]	P [41]	3290000	2260000	4230000	3720000	2890000	1550000	1250000	1240000	1130000	2040000	1580000	824000	2620000	2280000	2100000	555000	606000	386000	2410000	1400000	1590000	552000	732000	181000	4070000	3740000	5960000	1300000	960000	1250000	867000	2730000	1560000	4570000	3060000	2740000	1050000	916000	1590000
24	222	1.24	Ethyl 2-hydroxypropanoate	C5H10O3	97-64-3	2	816.88	819	[18]	P [16]	1590000	1770000	1860000	271000	441000	387000	228000	328000	368000	598000	705000	825000	1250000	1120000	1170000	546000	557000	588000	444000	477000	515000	590000	824000	542000	186000	180000	198000	544000	635000	563000	347000	278000	347000	390000	300000	403000	465000	601000	718000
25	258	0.48	Ethyl 2-methylbutanoate	C7H14O2	7452-79-1	1	847.79	851	[3]	P [41,45]	897000	560000	743000	228000	373000	250000	513000	392000	364000	210000	120000	352000	636000	566000	848000	370000	201000	296000	281000	167000	215000	375000	374000	166000	1080000	944000	872000	527000	522000	482000	97400	53500	127000	766000	694000	585000	367000	240000	307000
26	264	0.49	Ethyl 3-methylbutanoate	C7H14O2	108-64-5	2	853.06	857	[3]	P [7,31]	2640000	3620000	2830000	1420000	961000	1050000	1340000	1410000	1160000	739000	586000	416000	1320000	1040000	962000	1170000	1480000	787000	1280000	1010000	1160000	1280000	1370000	844000	2810000	3060000	2680000	3570000	1930000	1900000	214000	187000	350000	1920000	1690000	1500000	945000	340000	646000
27	282	0.5	2-Methylpropyl propanoate	C7H14O2	540-42-1	2	868.86	863	[46]	–	240000	330000	453000	327000	459000	153000	107000	82600	104000	-	-	-	-	-	-	-	-	-	-	-	-	152000	120000	92800	343000	278000	312000	202000	127000	125000	-	-	-	156000	354000	373000	152000	109000	136000
28	294	0.62	2/3-Methylbutyl acetate	C7H14O2	123-92-2	2	879.49	877	[18]	P[6,7,9,11,12,28,31,38,41,45]	298000000	228000000	294000000	568000000	330000000	364000000	324000000	488000000	364000000	439000000	392000000	254000000	295000000	268000000	313000000	399000000	384000000	272000000	265000000	345000000	340000000	384000000	271000000	216000000	488000000	636000000	374000000	327000000	366000000	341000000	254000000	201000000	176000000	384000000	477000000	455000000	360000000	293000000	255000000
29	324	0.53	Ethyl pentanoate	C7H14O2	539-82-2	2	904.53	906	[18]	P [12,31,39]	2850000	3350000	2850000	4520000	4120000	4090000	3140000	2650000	2500000	1730000	1190000	1610000	2290000	2280000	2210000	1620000	1260000	684000	2790000	1790000	1330000	3600000	3040000	2140000	756000	2380000	3770000	1140000	2860000	2740000	190000	325000	154000	3020000	476000	154000	555000	493000	1210000
30	342	0.48	2-Methylpropyl 2-methylpropanoate	C8H16O2	97-85-8	2	917	913.8	[14]	P [9,19]	216000	206000	462000	-	-	-	vt	vt	vt	vt	vt	vt	75800	76800	85700	vt	vt	vt	-	-	-	-	-	-	-	-	-	406000	456000	317000	135000	492000	213000	-	-	-	249000	340000	143000
31	342	0.57	Pentyl acetate	C7H14O2	628-63-7	2	917.06	916	[3]	P [47]	1560000	1240000	1360000	484000	333000	269000	1700000	1540000	1540000	1010000	724000	374000	2210000	1390000	1250000	1260000	931000	929000	957000	932000	838000	758000	732000	vt	2630000	2280000	1930000	366000	483000	386000	384000	165000	87900	758000	732000	471000	223000	vt	vt
32	342	0.66	C7 ester (m/z 43, 95, 97, 42)	-	-	3	917.13	-	–	–	135000	121000	120000	66000	78300	61100	191000	236000	194000	91700	115000	70000	63600	54200	29900	247000	199000	106000	172000	206000	169000	31000	25400	33400	389000	247000	384000	59800	42500	42100	28100	21400	22500	80500	142000	94900	58500	55600	42300
33	372	0.64	Ethyl (E)-2-methyl-2-butenoate	C7H12O2	5837-78-5	2	937.94	943	[48]	–	567000	452000	462000	449000	450000	503000	674000	657000	567000	816000	642000	360000	1350000	1150000	1040000	464000	416000	221000	688000	550000	545000	891000	686000	511000	1370000	1180000	1170000	945000	781000	619000	286000	235000	209000	892000	624000	576000	360000	433000	307000
34	408	0.54	Ethyl 4-methylpentanoate	C8H16O2	25415-67-2	2	962.88	967	[39]	P [39]	483000	231000	103000	257000	254000	205000	213000	137000	122000	199000	126000	150000	578000	415000	300000	94000	53300	338000	55600	72400	150000	191000	157000	107000	696000	583000	548000	291000	249000	194000	160000	149000	105000	384000	338000	141000	226000	220000	168000
35	414	0.52	Pentyl propanate	C8H16O2	624-54-4	2	967.03	969	[18]	P [47]	9860000	8080000	9170000	3060000	3000000	2040000	5070000	4660000	4170000	955000	812000	584000	808000	695000	688000	2070000	2320000	226000	881000	776000	241000	411000	424000	1210000	10500000	9890000	8640000	652000	499000	389000	622000	698000	686000	1240000	844000	1090000	2020000	1350000	986000
36	432	0.57	C8 ester (m/z 43, 69, 56, 61)	-	-	3	979.56	-	–	–	2540000	1970000	3010000	1820000	vt	1830000	1370000	1100000	944000	5250000	3430000	1630000	7670000	6330000	5630000	1480000	1020000	727000	5240000	4380000	3850000	821000	1160000	670000	1070000	2800000	2640000	2050000	1880000	1830000	2830000	2030000	1580000	4370000	4790000	1680000	2020000	1620000	1800000
37	438	0.61	Ethyl 5-hexenoate (m/z 60, 41, 39, 68)	C8H14O2	-	3	984	-	–	–	1760000	1040000	2070000	572000	382000	466000	708000	707000	644000	-	-	-	-	-	-	-	-	-	-	-	-	901000	1170000	900000	1630000	1570000	368000	1980000	1870000	1810000	-	-	-	1870000	1740000	1730000	171000	108000	862000
38	456	0.57	Ethyl hexanoate	C8H16O2	123-66-0	1	996.23	996	[5]	P[6,7,9,11,12,16,28,31,38,39,41,45]	276000000	225000000	333000000	171000000	181000000	149000000	287000000	239000000	202000000	183000000	156000000	241000000	277000000	280000000	232000000	140000000	108000000	89300000	249000000	218000000	201000000	70000000	122000000	83700000	275000000	249000000	214000000	195000000	257000000	161000000	81400000	100000000	97900000	270000000	181000000	238000000	147000000	187000000	101000000
39	468	0.66	3-Hexenol acetate (isomer)	C8H14O2	3681-71-8	2	1004.6	1008	[49]	–	8160000	4410000	6080000	-	-	-	591000	479000	435000	-	409000	-	837000	724000	vt	709000	-	379000	598000	1380000	430000	-	-	-	587000	619000	550000	531000	408000	150000	-	-	-	-	-	-	352000	375000	vt
40	480	0.5	3-Methylpropyl butanoate	C8H16O2	557-00-6	2	1012.8	1017	[3]	–	2400000	2490000	3230000	-	-	-	-	-	-	1340000	1210000	422000	2280000	1560000	1750000	1620000	812000	1050000	-	-	-	-	-	-	1370000	1100000	457000	-	-	-	-	-	-	-	-	-	3780000	2640000	vt
41	480	0.59	Hexyl acetate	C8H16O2	142-92-7	1	1012.9	1006	[3]	P[7,9,11,12,16,28,31,38,41]	20900000	15000000	22200000	13700000	13100000	9900000	22200000	18700000	17000000	21000000	13800000	6780000	33800000	29900000	26000000	16200000	12700000	6990000	26000000	21900000	18800000	7350000	6740000	4490000	48000000	45500000	40000000	15800000	12700000	11400000	8090000	6960000	5360000	20200000	18600000	15900000	11400000	10100000	7220000
42	486	0.67	3-Hexenol acetate (isomer)	C8H14O2	3681-71-8	2	1017.1	1008	[49]	–	325000	167000	169000	-	-	-	108000	160000	167000	75400	63300	115000	216000	197000	172000	161000	164000	71500	308000	197000	258000	97600	141000	221000	428000	278000	264000	192000	192000	187000	-	-	-	360000	112000	320000	164000	188000	136000
43	498	0.66	C8 ester (m/z 55, 41, 82, 39)	-	-	3	1025.5	-	–	–	2130000	1600000	2140000	-	-	-	217000	191000	217000	346000	300000	205000	532000	-	-	259000	277000	170000	vt	vt	vt	-	-	-	909000	829000	731000	106000	84600	91800	491000	202000	425000	162000	159000	127000	122000	132000	59200
44	522	0.65	Ethyl 2-hexenoate	C8H14O2	1552-67-6	2	1042.1	1045	[3]	–	383000	360000	458000	363000	410000	291000	420000	399000	391000	223000	179000	307000	413000	341000	341000	182000	181000	72200	366000	287000	270000	622000	601000	292000	537000	570000	488000	786000	630000	575000	110000	91300	111000	752000	674000	432000	533000	441000	314000
45	540	0.53	3-Methylbutyl butanoate	C9H18O2	106-27-4	2	1054.5	1059	[18]	P [11,12,41]	898000	617000	738000	796000	399000	618000	1310000	1330000	1520000	564000	546000	455000	1180000	1100000	837000	537000	404000	275000	1060000	1030000	786000	356000	335000	535000	1730000	1510000	1030000	499000	285000	463000	91000	73300	56900	1230000	1200000	1120000	398000	589000	265000
46	552	0.55	Ethyl 5-methylhexanoate	C9H18O2	10236-10-9	2	1062.9	1072	[50]	P [9,12]	907000	519000	1070000	1280000	1730000	2400000	1570000	1070000	1030000	393000	296000	116000	1410000	1090000	858000	771000	376000	431000	123000	118000	54900	329000	206000	125000	3960000	3890000	2670000	279000	215000	91100	269000	127000	168000	659000	717000	468000	300000	294000	252000
47	570	0.58	C9 ester (m/z 43, 56, 55, 41)	-	-	3	1075.4	-	–	–	689000	604000	510000	706000	667000	842000	650000	730000	518000	608000	380000	336000	1090000	963000	1440000	431000	345000	192000	2490000	2380000	1740000	532000	428000	256000	2060000	1740000	1440000	915000	945000	788000	101000	271000	52100	1780000	1710000	2520000	1190000	828000	622000
48	582	0.59	4-Methylhexyl acetate	C9H18O2	91367-59-8	2	1083.7	-	–	–	497000	173000	536000	180000	232000	166000	132000	214000	162000	242000	149000	190000	423000	605000	206000	393000	137000	164000	962000	782000	668000	171000	60900	80600	461000	373000	632000	334000	249000	85100	-	-	-	268000	436000	225000	251000	177000	253000
49	594	0.63	Ethyl (E)-4-heptenoate	C9H16O2	54340-70-4	2	1092.1	1090	[46]	–	276000	1040000	190000	1230000	1030000	278000	1330000	1340000	1120000	574000	174000	186000	1020000	875000	706000	207000	424000	491000	898000	751000	467000	1130000	164000	545000	2720000	2960000	3950000	748000	1250000	546000	-	-	-	2330000	2080000	674000	1380000	1180000	2190000
50	600	0.55	Propyl hexanoate	C9H18O2	626-77-7	2	1096.2	1101	[3]	–	177000	214000	243000	217000	211000	147000	73700	151000	143000	84200	30600	41100	301000	186000	225000	84100	32300	5510	122000	145000	86000	49300	21700	36700	457000	414000	351000	53800	105000	119000	75800	13500	18800	249000	303000	228000	234000	149000	114000
51	600	0.57	Ethyl heptanoate	C9H18O2	106-30-9	1	1096.2	1095	[18]	P [7,9,16,28,38]	4890000	3150000	5440000	3500000	6120000	3000000	7650000	5750000	5660000	3130000	1910000	896000	6420000	5930000	4620000	1270000	937000	573000	4980000	4170000	3420000	7250000	5220000	3860000	11600000	10500000	9480000	8480000	8170000	7270000	1390000	995000	723000	20400000	17500000	15100000	10900000	9350000	7340000
52	600	0.86	Ethyl 2,4-hexadienoate	C8H12O2	2396-84-1	2	1096.4	1093	[4]	–	346000	311000	357000	-	-	-	799000	721000	728000	4040000	3260000	2250000	8970000	8110000	8270000	-	-	-	-	-	-	-	-	-	-	-	-	712000	633000	703000	14500000	14000000	12400000	945000	920000	474000	679000	448000	746000
53	624	0.59	Heptyl acetate	C9H18O2	112-06-1	2	1112.9	1113	[18]	P[7,9,11,12,16,28,38]	9340000	6380000	10500000	4820000	3540000	4500000	11400000	9590000	8730000	5900000	3710000	1390000	13600000	11600000	9700000	2260000	1320000	701000	12000000	9790000	7620000	3280000	2840000	2760000	20300000	20100000	17700000	28000000	24100000	22400000	1130000	1610000	1440000	33000000	30500000	22100000	19700000	15600000	12000000
54	642	0.6	Methyl octanoate	C9H18O2	111-11-5	2	1125.4	1130	[3]	–	137000	257000	347000	115000	171000	67500	160000	328000	326000	134000	109000	56500	752000	197000	166000	293000	336000	248000	277000	477000	597000	137000	64700	114000	102000	104000	283000	534000	351000	221000	51900	164000	66000	607000	614000	823000	490000	369000	274000
55	660	0.55	2-Octyl acetate (m/z 43, 87, 41, 55)	C10H20O2	2051-50-5	3	1138.1	-	–	–	vt	vt	vt	vt	vt	vt	185000	193000	63100	397000	242000	195000	266000	103000	196000	vt	vt	vt	190000	88200	139000	vt	vt	vt	370000	343000	280000	80300	99300	95000	196000	88700	154000	184000	192000	333000	208000	222000	141000
56	660	0.9	C9 ester (m/z 57 85 41 59)	-	-	3	1138.1	-	–	–	495000	414000	560000	141000	187000	218000	263000	299000	310000	197000	188000	188000	451000	437000	427000	795000	774000	894000	vt	vt	vt	214000	187000	204000	112000	124000	177000	90400	87600	140000	733000	1160000	885000	102000	130000	117000	152000	188000	128000
57	678	0.54	2-Methylpropyl hexanoate	C10H20O2	105-79-3	2	1150.4	1154	[18]	–	93800	58400	153000	106000	181000	172000	179000	141000	142000	44500	32600	16100	208000	193000	132000	13300	23600	11400	309000	266000	190000	93600	17500	39500	406000	288000	244000	23500	39300	40200	24600	26400	21800	323000	289000	263000	227000	168000	143000
58	678	0.56	2-Ethylhexyl acetate	C10H20O2	103-09-3	2	1150.4	1159	[51]	–	vt	vt	2230000	275000	523000	139000	163000	279000	475000	43600	265000	288000	177000	316000	111000	938000	1850000	1520000	1020000	609000	142000	91400	402000	544000	1070000	864000	535000	329000	411000	801000	1150000	585000	559000	492000	454000	654000	298000	523000	515000
59	720	1.02	Diethyl butanedioate	C8H14O4	123-25-1	1	1179.9	1189	[3]	P [6,38,52]	1310000	1320000	1480000	994000	894000	1560000	1090000	1330000	1290000	777000	999000	935000	1600000	1380000	1520000	434000	378000	328000	vt	vt	262000	1520000	1650000	1440000	37500	214000	49100	320000	381000	384000	1190000	1290000	1250000	584000	712000	616000	838000	961000	946000
60	732	0.56	Hexyl butanoate	C10H20O2	2639-63-6	2	1187.9	1191	[4]		84400	442000	490000	156000	187000	194000	63800	146000	76300	268000	105000	275000	vt	vt	vt	109000	195000	131000	vt	vt	vt	230000	349000	219000	164000	188000	152000	140000	120000	55200	323000	135000	104000	101000	144000	161000	83400	99900	217000
61	744	0.59	Ethyl octanoate	C10H20O2	106-32-1	1	1196.2	1196	[5]	P[7,9,11,12,28,31,38,39,41,45,47]	165000000	177000000	192000000	448000000	364000000	217000000	218000000	218000000	141000000	157000000	145000000	120000000	275000000	309000000	291000000	180000000	139000000	136000000	346000000	334000000	318000000	340000000	203000000	237000000	441000000	260000000	167000000	234000000	279000000	230000000	166000000	105000000	113000000	328000000	493000000	195000000	390000000	445000000	294000000
62	762	0.6	Octyl acetate	C10H20O2	112-14-1	2	1209.5	1211	[18]	P [7,9,12,28,31]	2710000	9790000	14800000	12200000	13500000	8710000	33200000	26000000	24400000	9250000	4630000	2260000	24900000	24600000	19000000	1660000	1410000	1240000	23700000	22500000	16800000	6320000	5860000	3520000	41100000	42000000	34800000	7290000	7720000	6540000	2890000	2520000	2270000	31700000	33400000	38800000	23000000	2220000	1220000
63	816	0.55	Isopentyl hexanoate	C11H22O2	2198-61-0	2	1253	1254	[18]	P [7,9,16]	-	278000	146000	365000	1150000	459000	1200000	989000	945000	383000	342000	57800	1690000	1490000	215000	203000	192000	85900	1270000	1330000	1150000	998000	519000	906000	1580000	1520000	1040000	-	-	-	vt	vt	vt	3590000	2590000	1880000	202000	1490000	1470000
64	876	0.58	Ethyl nonanoate	C11H22O2	123-29-5	1	1295.9	1295	[18]	P [7,9,12]	1130000	767000	1790000	1030000	3990000	986000	2790000	2410000	2140000	1320000	789000	534000	4940000	3700000	2640000	1010000	846000	628000	1990000	1860000	1490000	3820000	2760000	3320000	2770000	2080000	1990000	2100000	1750000	1910000	956000	453000	572000	6770000	5350000	5280000	4800000	4430000	3000000
65	924	0.78	C11 ester (m/z 85, 57, 113, 43)	-	-	3	1332.4	-	–		536000	673000	332000	98600	114000	201000	76000	73300	75000	691000	797000	900000	97600	145000	163000	107000	107000	73800	213000	305000	312000	320000	282000	629000	32900	34500	56000	81200	51600	116000	700000	838000	716000	177000	276000	331000	204000	185000	241000
66	924	1.12	C11 ester (m/z 71, 117, 43, 89)	-	-	3	1332.7	-	–	–	412000	306000	369000	343000	519000	696000	124000	145000	154000	135000	140000	177000	95400	103000	114000	163000	134000	141000	125000	144000	153000	424000	594000	630000	402000	284000	158000	1160000	1160000	1210000	519000	449000	481000	515000	470000	493000	595000	622000	436000
67	948	1.03	C11 ester (m/z 57, 71, 43, 41)	-	-	3	1350.8	-	–	–	951000	827000	1580000	443000	354000	491000	279000	284000	428000	401000	618000	469000	495000	469000	405000	447000	400000	400000	254000	340000	403000	358000	635000	754000	187000	118000	394000	216000	287000	244000	575000	1290000	1270000	200000	102000	295000	493000	435000	617000
68	972	0.66	C12 ester(m/z 57, 43, 67, 41)	-	-	3	1368.7	-	–	–	780000	1010000	750000	853000	758000	950000	806000	873000	932000	1050000	743000	636000	987000	1040000	707000	1160000	880000	858000	734000	781000	711000	725000	1090000	884000	153000	144000	78500	882000	1040000	925000	714000	1360000	908000	671000	510000	684000	1630000	1730000	1680000
69	978	0.93	3-Hydroxy-2,4,4-trimethylpentyl 2-methyl-propanoate	C12H24O3	74367-34-3	2	1373.4	1364	[25]	P [7]	1610000	1400000	2610000	691000	527000	509000	719000	831000	1030000	1080000	1250000	1050000	865000	1010000	931000	1130000	1020000	907000	1140000	1210000	968000	733000	1340000	695000	563000	753000	731000	295000	421000	455000	1070000	1340000	1230000	298000	377000	400000	573000	457000	605000
70	996	0.64	Ethyl 9-decenoate	C12H22O2	67233-91-4	2	1386.8	1388	[18]	P [7,9,12,38]	11900000	8780000	14200000	2790000	1450000	7210000	50700000	32000000	34700000	23500000	11900000	6640000	56500000	55700000	43400000	3740000	2910000	1680000	3760000	9420000	6310000	55800000	43900000	34800000	49200000	40500000	42400000	61000000	32900000	54100000	670000	2360000	787000	64400000	43200000	55200000	51800000	35400000	14100000
71	1008	0.58	Ethyl decanoate	C12H24O2	110-38-3	1	1395.9	1396	[5]	P[6,7,9,11,16,28,31,38,41,45,47]	29900000	28300000	35800000	66100000	114000000	56300000	190000000	138000000	137000000	45700000	51000000	41700000	131000000	134000000	116000000	73600000	62200000	51000000	154000000	127000000	99100000	123000000	104000000	88600000	108000000	69700000	78300000	187000000	154000000	76300000	49300000	31600000	41000000	290000000	202000000	266000000	279000000	255000000	199000000
72	1026	0.6	Decyl acetate	C12H24O2	112-17-4	2	1410.5	1408	[18]	–	-	-	-	133000	427000	255000	1300000	1390000	1170000	464000	304000	181000	1630000	1450000	1060000	-	-	-	1220000	857000	630000	-	-	-	1990000	711000	1470000	-	-	-	-	-	-	-	-	-	1480000	vt	1320000
73	1068	0.56	3-Methylbutyl octanoate	C13H26O2	2035-99-6	2	1445.5	1447	[18]	P [7]	372000	263000	509000	570000	1470000	560000	1380000	734000	843000	508000	580000	332000	3160000	2950000	2280000	787000	793000	491000	3490000	2240000	1600000	1940000	1370000	1470000	1190000	500000	639000	1400000	1440000	1220000	643000	456000	548000	2510000	2020000	1930000	2210000	2480000	2040000
74	1164	0.62	Methyl dodecanoate	C13H26O2	111-82-0	2	1530	1526	[4]	–	315000	183000	481000	136000	104000	106000	1720000	988000	1090000	304000	116000	342000	256000	454000	181000	734000	667000	836000	713000	154000	520000	152000	195000	181000	133000	122000	112000	351000	228000	257000	277000	277000	264000	125000	122000	212000	179000	177000	191000
75	1176	1.03	3-Hydroxy-tridecanoate	C15H30O3	107141-15-1	2	1542.2	1539	[50]	–	1180000	911000	1130000	770000	833000	728000	372000	385000	389000	536000	488000	462000	361000	416000	380000	180000	195000	211000	144000	179000	191000	884000	1140000	1630000	635000	631000	840000	229000	293000	379000	1590000	1530000	1690000	696000	388000	847000	643000	718000	848000
76	1230	0.56	Ethyl dodecanoate	C14H28O2	106-33-2	2	1594.7	1594	[18]	P[6,7,11,31,38,41]	2520000	1700000	2470000	31500000	37400000	22800000	16900000	47400000	31900000	7810000	5890000	5280000	88000000	69000000	115000000	40800000	29500000	24900000	157000000	90400000	67200000	30000000	26500000	28700000	21100000	7270000	14900000	36400000	32900000	30300000	6780000	4820000	4840000	26400000	21100000	21100000	41500000	32800000	27900000
77	1236	0.56	1-(1,1-Dimethylethyl)-2-methyl-1,3-propanediyl 2-methyl-propanoate	C16H30O4	74381-40-1	2	1600.8	1607	[18]	–	9440000	9470000	18400000	14400000	10300000	8490000	16600000	10300000	12700000	24500000	23700000	13300000	24300000	6860000	4940000	11300000	17800000	7500000	8670000	9120000	11800000	12600000	15000000	10200000	13900000	14900000	13800000	6620000	7420000	7190000	17700000	16200000	15100000	4820000	4930000	4780000	11200000	11500000	12700000
78	1248	0.55	Dodecanyl acetate	C14H28O2	112-66-3	2	1617.4	1608	[18]	–	-	-	-	-	-	-	253000	531000	359000	305000	128000	203000	929000	1090000	301000	-	-	-	755000	569000	309000	-	-	-	257000	221000	181000	173000	135000	139000	121000	91500	108000	116000	127000	118000	133000	122000	126000
79	1260	0.5	1-Methylethyl dodecanoate	C15H30O2	10233-13-3	2	1634	1632	[18]	–	418000	365000	1200000	1130000	853000	1120000	vt	vt	vt	481000	540000	541000	vt	vt	vt	634000	vt	vt	vt	854000	472000	724000	2750000	895000	vt	vt	vt	2050000	1460000	5290000	3080000	1450000	1180000	797000	1390000	1610000	1900000	1040000	1310000
80	1272	0.52	3-Methylbutyl decanoate	C15H30O2	2306-91-4	2	1650.7	1641	[18]	P [9]	195000	179000	273000	464000	960000	289000	vt	772000	vt	169000	266000	52800	343000	471000	616000	345000	173000	87300	vt	vt	vt	1250000	964000	980000	-	-	-	-	-	-	-	-	-	1090000	869000	474000	vt	1390000	1280000
81	1296	0.78	Hexyl 2-hydroxybenzoate	C13H18O3	6259-76-3	2	1684.4	1678	[3]	–	954000	1090000	1720000	1660000	1080000	1040000	681000	719000	1230000	617000	1280000	575000	880000	501000	699000	669000	653000	603000	642000	779000	1120000	1410000	2310000	2380000	1000000	812000	1060000	1750000	1630000	1540000	2780000	2670000	2750000	1230000	1520000	1460000	1830000	2350000	2140000
82	1326	0.53	Methyl tetradecanoate	C15H30O2	124-10-7	2	1730.9	1726	[53]	–	vt	vt	2450000	366000	316000	105000	2010000	1570000	2020000	vt	vt	vt	vt	vt	vt	375000	208000	308000	929000	146000	1000000	362000	417000	137000	758000	722000	355000	322000	229000	282000	493000	475000	247000	377000	370000	381000	387000	322000	556000
83	1368	0.54	Ethyl tetradecanoate	C16H32O2	124-06-1	2	1801.1	1801	[18]	P [7]	360000	484000	757000	812000	698000	910000	310000	286000	311000	178000	239000	128000	530000	1080000	1280000	596000	447000	289000	901000	331000	336000	12700000	229000	16600000	619000	479000	448000	961000	980000	968000	1270000	891000	1050000	1110000	429000	653000	1250000	1420000	1380000
84	1374	0.66	C16 ester (m/z 120, 73, 138, 121)	-	-	3	1813.9	-	–	–	223000	166000	296000	800000	433000	395000	170000	182000	271000	136000	194000	180000	103000	135000	109000	218000	126000	149000	137000	88600	225000	1150000	1190000	917000	763000	693000	402000	204000	130000	407000	581000	815000	892000	503000	505000	549000	296000	578000	599000
85	1380	0.5	1-Methylethyl tetradecanoate	C17H34O2	110-27-0	2	1826	1834	[18]	–	1540000	5390000	2530000	5580000	1770000	1090000	855000	984000	983000	743000	1760000	2390000	1490000	505000	898000	971000	1100000	672000	1530000	2920000	2820000	1590000	5040000	1660000	5770000	7590000	1170000	1700000	778000	1210000	1600000	1390000	1970000	3070000	2790000	795000	3520000	1290000	2760000
86	1476	0.53	1-Methylethyl hexadecanoate	C19H36O2	142-91-6	2	2026.1	2037	[3]	–	4780000	10400000	8920000	1220000	555000	624000	930000	1270000	815000	1780000	951000	1500000	1640000	2510000	1670000	1560000	907000	979000	998000	1480000	1620000	1720000	2060000	992000	124000	77200	162000	135000	471000	55100	78000	74400	75700	56200	2160000	2100000	194000	vt	47600
			Aromatics
87	594	1.22	Methyl benzoate	C8H8O2	93-58-3	2	1092.5	1096	[18]	–	93500	102000	110000	24800	23400	30800	91100	105000	93400	110000	95400	66700	139000	125000	127000	111000	104000	77100	44200	33700	47800	23900	28400	26500	20800	27700	20800	19300	39600	28300	60800	69800	60200	14200	19200	24800	22800	31200	26000
88	696	1.29	Phenylmethyl acetate	C9H10O2	140-11-4	2	1163.4	1166	[18]	–	433000	483000	558000	317000	296000	217000	263000	284000	332000	757000	815000	819000	436000	512000	496000	526000	551000	575000	296000	264000	291000	119000	398000	309000	295000	248000	139000	413000	712000	581000	600000	609000	636000	99400	127000	58000	90400	190000	150000
89	702	1.07	Ethyl benzoate	C9H10O2	93-89-0	2	1167.4	1172	[18]	P [7,31]	14900000	12100000	16300000	5970000	6050000	5360000	8640000	8200000	7840000	8170000	6440000	4690000	8320000	8180000	7570000	6550000	5730000	4200000	6210000	5520000	5330000	7170000	6580000	5730000	11300000	10800000	11400000	5290000	7860000	4980000	4060000	3670000	3230000	7260000	6770000	7150000	7510000	5080000	4450000
90	714	1.35	Methyl 2-phenylacetate	C9H10O2	101-41-7	2	1175.9	1179	[4]	–	1920000	2160000	1900000	925000	876000	804000	616000	608000	769000	206000	181000	203000	116000	106000	101000	107000	107000	104000	661000	600000	666000	923000	898000	1060000	708000	678000	593000	652000	818000	902000	334000	271000	249000	653000	602000	504000	660000	704000	538000
91	714	1.46	2-Phenylethyl formate	C9H10O2	104-62-1	2	1176	1174	[26]	–	751000	442000	726000	159000	176000	212000	261000	475000	308000	307000	241000	271000	148000	161000	166000	110000	119000	121000	122000	180000	218000	69300	191000	135000	236000	219000	235000	66000	112000	135000	291000	198000	195000	194000	218000	233000	254000	341000	326000
92	810	1.13	Ethyl phenylacetate	C10H12O2	101-97-3	1	1246.3	1248	[18]	P [7,9,12]	12300000	11900000	13800000	7640000	8190000	8080000	5880000	5880000	5990000	5940000	5390000	5310000	9610000	10800000	10400000	6760000	6700000	5890000	4550000	4660000	4530000	8600000	8600000	9540000	7430000	7420000	7970000	7240000	7840000	8030000	7730000	7840000	7310000	7140000	7100000	7470000	7400000	7620000	7190000
93	828	1.15	2-Phenylethyl acetate	C10H12O2	103-45-7	2	1260	1260	[5]	P[6,7,9,11,12,16,28,31,38,39,41,45]	874000000	619000000	663000000	445000000	347000000	498000000	350000000	624000000	477000000	648000000	609000000	653000000	341000000	657000000	640000000	742000000	439000000	716000000	541000000	514000000	561000000	788000000	642000000	518000000	556000000	622000000	783000000	320000000	219000000	331000000	490000000	655000000	522000000	536000000	545000000	571000000	557000000	585000000	868000000
94	906	0.88	a,a-Dimethylphenylethyl acetate	C12H16O2	151-05-3	2	1318.8	1320	[48]	–	213000	210000	247000	327000	357000	488000	429000	424000	498000	779000	597000	698000	305000	281000	277000	894000	769000	658000	317000	392000	304000	427000	492000	682000	143000	142000	136000	407000	406000	435000	984000	889000	798000	191000	182000	210000	646000	716000	763000
95	948	1.06	2-Phenylethyl propanoate	C11H14O2	122-70-3	2	1350.8	1357	[18]	–	15600000	14700000	17500000	14300000	14400000	13500000	8850000	8930000	9080000	6380000	5800000	5250000	4410000	4980000	4580000	4230000	4070000	3540000	5450000	5520000	5340000	6220000	6380000	7220000	15400000	15300000	16700000	7220000	8820000	9160000	10700000	9990000	9150000	27700000	25500000	28900000	27900000	27200000	23900000
96	972	1.16	3-Phenylpropyl acetate	C11H14O2	122-72-5	2	1369.1	1388	[51]	–	275000	234000	250000	291000	199000	188000	182000	179000	158000	380000	364000	306000	161000	203000	184000	492000	475000	442000	608000	649000	606000	178000	126000	149000	145000	198000	172000	176000	191000	205000	557000	589000	415000	191000	254000	311000	191000	176000	179000
97	978	0.98	4-Phenyl-2-butyl acetate	C12H16O2	10415-88-0	2	1373.5	1376	[48]	–	140000	93800	222000	264000	121000	251000	240000	203000	194000	167000	122000	110000	148000	144000	194000	311000	240000	234000	499000	481000	469000	-	-	-	461000	241000	536000	246000	244000	301000	157000	231000	332000	503000	388000	576000	694000	458000	607000
98	1002	0.93	Phenylethyl 2-methylpropanoate	C12H16O2	103-48-0	2	1391.6	1395	[54]	P [11,31]	249000	261000	305000	418000	309000	555000	162000	195000	75800	167000	102000	113000	62500	108000	71200	143000	92800	109000	182000	183000	182000	248000	255000	327000	564000	629000	628000	176000	211000	527000	204000	211000	155000	599000	605000	411000	529000	577000	516000
99	1062	1	2-Phenylethyl butanoate	C12H16O2	103-52-6	2	1440.8	1441	[18]	P [9,11,12]	10200000	9450000	11500000	15000000	15400000	14200000	13100000	13300000	12400000	7310000	6040000	5540000	7860000	9230000	8300000	3180000	2970000	2520000	12200000	12200000	11100000	4020000	4320000	4650000	14000000	14500000	14800000	9600000	11200000	12300000	11500000	11300000	10100000	6030000	6240000	6530000	5880000	5990000	5730000
100	1092	1.4	Ethyl 3-phenylpropenoate	C11H12O2	103-36-6	2	1466.2	1480	[55]	P [7,38]	2910000	2780000	3260000	3090000	3320000	3200000	2530000	2690000	2990000	2470000	2050000	2150000	1830000	2170000	2020000	2170000	2000000	1850000	1470000	1450000	1340000	6410000	7020000	8250000	3610000	3930000	3940000	4710000	5660000	6220000	4010000	4060000	3890000	3700000	3570000	3940000	3720000	3890000	3730000
101	1122	0.78	α,α-Dimethylphenylethyl butanoate	C14H20O2	10094-34-5	2	1490.7	1495	[48]	–	182000	154000	194000	308000	280000	299000	226000	348000	354000	162000	152000	134000	218000	168000	205000	378000	222000	194000	158000	152000	189000	343000	489000	203000	104000	84800	187000	279000	154000	372000	-	-	-	312000	252000	136000	296000	331000	335000
102	1320	0.64	2-Octyl benzoate (m/z 105,77,70, 41)	C15H22O2	6938-51-8	3	1721.1	-	–	–	315000	261000	372000	796000	334000	252000	146000	187000	285000	152000	192000	274000	192000	364000	231000	196000	107000	134000	278000	142000	245000	320000	914000	302000	275000	257000	231000	214000	152000	193000	636000	398000	681000	135000	205000	221000	352000	282000	384000
103	1416	0.66	3,3,5-Trimethylcyclohexyl 2-hydroxybenzoate	C16H22O3	118-56-9	2	1901.4	1903.8	[14]	–	126000	181000	164000	471000	174000	339000	48100	88000	97100	77900	97700	93000	62700	68800	47200	101000	43700	99300	59100	37300	107000	1510000	1340000	586000	416000	303000	272000	263000	170000	231000	341000	269000	333000	279000	333000	317000	167000	494000	284000
			Subtotal (GC Peak Area)								1990000000			1730000000			1850000000			1580000000			1980000000			1530000000			1930000000			1680000000			2320000000			1590000000			1190000000			2260000000			2060000000
			Subtotal (%)								20.77			26.02			33.67			26.93			31.42			28.95			30.45			26.76			31.71			28.57			15.34			33.45			27.33
			Acids
104	108	3.1	Acetic acid	C2H4O2	64-19-7	2	637.02	631	[43]	P [7,9,12,28]	89500000	77000000	92700000	6410000	6970000	7570000	66300000	93200000	65100000	51400000	48600000	55500000	69600000	56900000	64100000	79000000	73300000	80200000	62800000	65900000	64600000	22600000	27400000	19400000	15100000	24700000	16900000	35400000	50500000	77200000	26100000	22500000	21700000	13000000	31600000	88800000	62400000	43600000	64300000
105	144	4.37	Propanoic acid	C3H6O2	79-09-4	1	702.4	707	[43]		2230000	1620000	996000	-	-	-	-	-	-	-	-	-	-	-	-	-	-	-	-	-	-	-	-	-	-	-	-	-	-	-	-	-	-	-	-	-	-	-	-
106	180	4.2	2-Methylpropanoic acid	C4H8O2	79-31-2	1	765.47	769	[43]	P [7,9]	4740000	4620000	5250000	-	-	-	1140000	1220000	1490000	1160000	1260000	1400000	1260000	734000	959000	1900000	2040000	2130000	1840000	1940000	1930000	-	-	-	-	-	-	-	-	-	-	-	-	-	-	-	-	-	-
107	210	5.19	Butanoic acid	C4H8O2	107-92-6	2	809.82	812	[43]	P [9,16,52]	4410000	3680000	4270000	-	-	-	1240000	1800000	1140000	1630000	1490000	2390000	2120000	1820000	1430000	962000	1280000	1710000	1630000	2040000	2440000	-	-	-	-	-	-	-	-	-	-	-	-	-	-	-	-	-	-
108	270	4.81	3-Methylbutanoic acid	C5H10O2	503-74-2	2	862.11	861	[43]	P [7,16]	14500000	13200000	15100000	18000000	16100000	17200000	10600000	11900000	12000000	12900000	14200000	9880000	11800000	10900000	11700000	15100000	16400000	17100000	4710000	7620000	9640000	7560000	19000000	17700000	13800000	10400000	18100000	12900000	14000000	13200000	15000000	9770000	17100000	12600000	13600000	14000000	15900000	18300000	16000000
109	282	4.56	2-Methylbutanoic acid	C5H10O2	116-53-0	2	872.42	875	[43]	P [7]	16700000	18400000	17100000	-	-	-	-	-	-	-	-	-	-	-	-	-	-	-	7660000	6130000	5840000	-	-	-	-	-	-	-	-	-	-	-	-	-	-	-	-	-	-
110	468	4.51	Hexanoic acid	C6H12O2	142-62-1	1	1007.3	997	[43]	P[7,9,11,12,16,28,38]	271000000	261000000	280000000	138000000	161000000	167000000	91400000	110000000	126000000	193000000	206000000	236000000	193000000	190000000	198000000	135000000	123000000	131000000	153000000	165000000	182000000	128000000	134000000	149000000	117000000	111000000	118000000	106000000	124000000	125000000	334000000	358000000	344000000	126000000	132000000	138000000	152000000	159000000	155000000
111	594	4.15	Heptanoic acid	C7H14O2	111-14-8	2	1094.5	1103	[43]	P [8,9,41]	3760000	2930000	3880000	3080000	1130000	1730000	-	-	-	1320000	2150000	2110000	-	-	-	-	-	-	-	-	-	5600000	858000	2490000	-	-	-	3630000	1950000	5490000	1820000	3000000	2230000	3490000	4450000	3800000	4690000	4620000	4070000
112	648	3.25	2-Ethylhexanoic acid	C8H16O2	149-57-5	2	1131.4	1129	[43]	–	402000	692000	342000	-	-	-	-	-	-	-	-	-	-	-	-	-	-	-	-	-	-	-	-	-	-	-	-	-	-	-	-	-	-	-	-	-	-	-	-
113	762	3.23	Octanoic Acid	C8H16O2	124-07-2	2	1211.5	1210	[43]	P[7,9,11,12,16,28,31,38,41]	2390000000	2220000000	2060000000	1980000000	1770000000	1450000000	1130000000	1190000000	1130000000	1720000000	1310000000	1590000000	1480000000	1380000000	2020000000	921000000	929000000	1130000000	1560000000	1550000000	1610000000	1570000000	1300000000	1620000000	1500000000	1490000000	1530000000	1160000000	1200000000	1360000000	2710000000	2610000000	2700000000	1380000000	1590000000	1470000000	2270000000	2370000000	1540000000
114	858	3.19	Nonanoic acid	C9H18O2	112-05-0	2	1284.2	1288	[43]	P [7,12,41]	11900000	14900000	15300000	7470000	6610000	7270000	2130000	3050000	3660000	5590000	7100000	6590000	3240000	2850000	2910000	2470000	vt	vt	2290000	1030000	1780000	6570000	7190000	8110000	5040000	4120000	4850000	3530000	4680000	4600000	7170000	8010000	7800000	5990000	5390000	7010000	5570000	6300000	6130000
115	984	3.47	9-Decenoic acid	C10H18O2	14436-32-9	2	1379.9	1388	[43]	P [7,12]	34600000	31300000	35400000	8990000	4460000	3270000	4340000	8100000	5880000	18500000	17800000	20300000	5940000	9360000	9430000	-	-	-	-	-	-	36800000	42400000	60200000	26400000	34500000	30000000	44700000	49500000	57700000	42300000	50400000	57800000	33500000	vt	27400000	29500000	26100000	31300000
116	990	2.79	Decanoic acid	C10H20O2	334-48-5	2	1383.9	1387	[43]	P[7,9,11,12,41]	495000000	412000000	533000000	552000000	559000000	542000000	299000000	400000000	285000000	472000000	459000000	553000000	386000000	470000000	497000000	168000000	138000000	126000000	153000000	149000000	147000000	306000000	348000000	402000000	351000000	415000000	426000000	237000000	280000000	326000000	585000000	577000000	525000000	509000000	453000000	495000000	516000000	586000000	554000000
117	1212	1.96	Dodecanoic acid	C12H24O2	143-07-7	2	1578.4	1609	[43]	P [7,41]	23600000	17000000	13800000	27300000	28100000	23900000	7930000	18700000	13900000	16200000	23300000	34500000	15800000	15200000	21400000	15500000	9390000	8120000	14300000	13100000	18700000	10100000	11100000	15000000	11100000	11000000	12900000	14800000	12400000	18600000	8470000	9010000	9920000	15100000	16300000	12500000	13700000	16400000	14700000
118	1350	1.32	Tetradecanoic acid	C14H28O2	544-63-8	2	1772.2	1788	[43]	–	25000000	17400000	9400000	6030000	10600000	15400000	vt	vt	vt	vt	vt	vt	vt	vt	vt	vt	vt	vt	vt	vt	vt	17200000	8920000	9560000	7580000	6300000	10100000	4130000	3520000	3830000	5800000	4750000	5370000	5540000	12300000	6310000	4430000	7940000	5820000
119	1422	1.14	Pentadecanoic acid	C15H30O2	1002-84-2	1	1914.5	1878	[4]	–	vt	vt	vt	3790000	9790000	15400000	vt	vt	vt	vt	vt	vt	vt	vt	vt	vt	vt	vt	vt	vt	vt	11800000	9740000	8480000	5360000	5260000	6150000	1580000	388000	1930000	2220000	4070000	3560000	4950000	4380000	2570000	1880000	4920000	3990000
120	1446	1.05	Hexadecanoic acid	C16H32O2	57-10-3	1	1964.9	1964	[43]	–	58200000	30700000	20600000	7910000	24100000	43500000	vt	vt	vt	vt	vt	vt	vt	vt	vt	vt	vt	vt	vt	vt	vt	50000000	22800000	21300000	16900000	16400000	17600000	5270000	7550000	5710000	9000000	8950000	8690000	16800000	18700000	11100000	8490000	14900000	11400000
			Subtotal (GC Peak Area)								3220000000			2550000000			1700000000			2370000000			2380000000			1370000000			1990000000			2140000000			2130000000			1790000000			3700000000			2230000000			2920000000
			Subtotal (%)								33.71			38.31			30.98			40.22			37.72			25.98			31.32			34.24			29.03			32.17			47.96			32.91			38.73
			Alcohols
			Aliphatics
121	84	0.61	1-Propanol	C3H8O	71-23-8	2	590.54	589	[43]	P [6,28]	9920000	14700000	17100000	25200000	22000000	20400000	5794228	7675540	6768881	3660000	5750000	4090000	2240000	3080000	3620000	4380000	3060000	3340000	3930000	4510000	3510000	11700000	15500000	14800000	25500000	18200000	22700000	6360000	6820000	8080000	7670000	6960000	7960000	14000000	17000000	16800000	13200000	17300000	11000000
122	102	0.66	2-Methyl-1-propanol	C4H10O	78-83-1	2	622.21	613	[43]	P[6,7,9,11,12,28,38,39,41,45]	85400000	133000000	84500000	68600000	71700000	65800000	40480287	38586100	52126646	37200000	35400000	35300000	35900000	41500000	41200000	43100000	44700000	44800000	61100000	52400000	51600000	64700000	61700000	64300000	70200000	157000000	70100000	1670000	2690000	2320000	45300000	44700000	47000000	67600000	65000000	61300000	60500000	59600000	54200000
123	114	0.75	1-Butanol	C4H10O	71-36-3	2	643.42	639	[43]	–	23200000	22400000	25300000	9540000	9560000	10300000	2506493	2724461	2649405	5850000	5990000	5860000	4330000	7120000	7120000	516000	554000	523000	3770000	3810000	3770000	3680000	3700000	3240000	13200000	12600000	13100000	3260000	3330000	3400000	7500000	7250000	7150000	6580000	7040000	7720000	7560000	7390000	7450000
124	156	1.03	3-Methyl-1-butanol	C5H12O	123-51-3	1	717.6	718	[5]	P[6,7,9,11,12,16,28,31,38,39,41,45]	1060000000	1100000000	927000000	225000000	149000000	102000000	150301896	126883079	184423092	204000000	233000000	178000000	212000000	131000000	174000000	335000000	360000000	479000000	225000000	357000000	225000000	234000000	369000000	222000000	150000000	132000000	210000000	110000000	228000000	189000000	183000000	302000000	160000000	347000000	157000000	429000000	64400000	83800000	106000000
125	162	0.86	2-Methyl-1-butanol	C5H12O	137-32-6	2	727.82	728	[5]	P [6,38,45]	552000000	430000000	571000000	272000000	502000000	307000000	248729443	392610452	358796019	313000000	471000000	306000000	309000000	298000000	447000000	322000000	475000000	330000000	439000000	368000000	585000000	365000000	278000000	324000000	322000000	401000000	268000000	333000000	416000000	211000000	319000000	257000000	397000000	395000000	365000000	280000000	504000000	302000000	373000000
126	174	1.18	4-Penten-1-ol (m/z 67, 39, 68, 44)	C5H10O	821-09-0	3	749.44	-	–	–	655000	783000	741000	80800	114000	vt	393543	465247	506433	368000	488000	545000	408000	372000	415000	520000	518000	551000	291000	350000	341000	vt	vt	vt	vt	vt	vt	vt	vt	vt	vt	vt	vt	vt	vt	vt	vt	vt	vt
127	180	0.94	1-Pentanol	C5H12O	71-41-0	1	759.54	764	[43]	P [9,16,45]	2580000	2660000	2470000	1220000	1380000	1100000	1619058	1790611	1677481	1990000	1680000	1830000	1790000	1630000	1900000	1250000	1620000	1250000	344000	669000	694000	-	-	-	1210000	1420000	1440000	453000	613000	574000	1020000	958000	1250000	-	-	-	-	-	-
128	186	1.24	2-Penten-1-ol	C5H10O	20273-24-9	2	770.6	768	[3]	–	253000	355000	508000	-	-	-	110683	90135	70106	71000	126000	127000	72000	vt	vt	107000	76700	57400	vt	34800	30600	-	-	-	-	-	-	-	-	-	-	-	-	-	-	-	-	-	-
129	204	3.31	2,3-Butanediol (isomer)	C4H10O2	513-85-9	2	802.9	796	[3]	P [9]	1250000	2220000	3280000	10300000	8690000	7840000	1922402	4722745	4281270	2620000	3280000	5890000	7490000	3800000	4870000	5200000	2330000	4720000	3370000	4570000	5080000	11500000	8760000	11000000	10700000	11600000	9820000	12700000	9660000	11700000	14000000	12100000	11800000	6210000	2640000	7830000	11400000	10100000	15500000
130	216	3.87	2,3-Butanediol (isomer)	C4H10O2	513-85-9	2	814	796	[3]	P [9]	vt	vt	vt	vt	vt	vt	250552	787753	808920	388000	734000	1220000	2170000	691000	1100000	683000	247000	451000	309000	889000	1150000	vt	vt	vt	vt	vt	vt	3990000	1850000	2470000	4380000	4080000	4160000	vt	vt	vt	2350000	2960000	6240000
131	246	1.02	4-Methyl-1-pentanol	C6H14O	626-89-1	2	837.74	843	[48]	–	474000	316000	495000	88200	69000	83500	270339	215404	322784	362000	352000	181000	323000	272000	301000	357000	334000	340000	192000	128000	202000	97300	104000	104000	234000	244000	234000	292000	293000	257000	825000	519000	570000	95700	72700	225000	379000	388000	472000
132	258	1.03	3-Methyl-1-pentanol	C6H14O	589-35-5	2	848.27	851	[43]	–	1800000	1820000	2030000	658000	765000	739000	230863	444188	237135	2920000	3100000	3250000	3450000	3190000	3180000	225000	260000	234000	941000	1020000	1040000	1240000	1290000	1060000	631000	724000	652000	788000	782000	851000	2740000	3000000	2930000	1840000	2020000	2150000	1720000	1700000	1590000
133	276	1.15	3-Hexen-1-ol	C6H12O	544-12-7	2	869.43	861	[3]	–	-	-	-	-	-	-	-	-	-	-	-	-	-	-	-	-	-	-	-	-	-	-	-	-	-	-	-	-	-	-	-	-	-	-	-	-	-	-	-
134	282	0.79	5-Methyl-2-hexanol (m/z 45, 43, 41, 55)	C7H16O	627-59-8	3	869.11	-	–	–	-	-	-	-	-	-	-	-	-	-	-	-	-	-	-	-	-	-	-	-	-	-	-	-	-	-	-	-	-	-	-	-	-	-	-	-	-	-	-
135	288	1.05	1-Hexanol	C6H14O	111-27-3	1	874.61	880	[43]	P[7,9,11,12,16,28,31,38]	6280000	6140000	5870000	2430000	2640000	3030000	2917922	3580819	3625664	3510000	3560000	3680000	3810000	4780000	4220000	3260000	3300000	3340000	1650000	1880000	2280000	2620000	2770000	2120000	3210000	3120000	4060000	2610000	2510000	2550000	2960000	2750000	2790000	2010000	1130000	2970000	2520000	2520000	2640000
136	312	0.76	4-Heptanol	C7H16O	589-55-9	2	895.4	895	[48]	–	-	-	-	-	-	-	-	-	-	-	-	-	-	-	-	-	-	-	-	-	-	-	-	-	-	-	-	-	-	-	-	-	-	-	-	-	-	-	-
137	324	0.85	2-Heptanol	C7H16O	543-49-7	2	904.76	907	[43]	–	348000	300000	361000	155000	182000	248000	205344	262294	243586	150000	152000	137000	197000	174000	185000	309000	294000	269000	171000	177000	186000	216000	226000	176000	217000	219000	176000	124000	114000	104000	375000	272000	303000	111000	106000	180000	224000	160000	171000
138	378	0.74	2-Methyl-4-heptanol (m/z 55, 69, 43, 41)	C8H18O	21570-35-4	3	944.01	-	–	–	-	-	-	-	-	-	-	-	-	-	-	-	-	-	-	-	-	-	-	-	-	vt	vt	vt	-	-	-	137000	161000	146000	-	-	-	132000	130000	vt	123000	113000	94600
139	414	1.28	4-Hepten-1-ol (m/z 81, 41, 55, 39, 67)	C7H14O	20851-55-2	3	967.56	-	–	–	480000	415000	488000	vt	vt	vt	110677	97680	132087	162000	156000	169000	145000	104000	156000	115000	115000	157000	61100	26100	62000	vt	vt	vt	-	-	-	-	-	-	-	-	-	-	-	-	-	-	-
140	420	0.83	5-Methyl-2-heptanol (m/z 45, 55, 41, 43)	C7H16O	627-59-8	3	974.51	-	–	–	-	-	-	-	-	-	-	-	-	-	-	-	-	-	-	-	-	-	-	-	-	-	-	-	-	-	-	vt	vt	vt	52800	63900	55600	31600	12500	32200	32500	35400	26200
141	420	1.07	1-Heptanol	C7H16O	111-70-6	2	974.66	970	[43]	P[7,9,11,12,16,38]	13200000	12400000	16300000	3830000	3010000	3610000	1427815	2574153	2556360	3340000	3290000	3030000	2340000	2770000	2300000	879000	1460000	1190000	833000	799000	605000	1680000	1950000	3800000	1620000	1430000	1380000	11400000	10300000	9120000	538000	2280000	2110000	5530000	5790000	2240000	1110000	1220000	1880000
142	426	1.12	1,5-Octadien-3-ol	C8H14O	50306-18-8	2	979.07	975	[56]	–	634000	391000	122000	vt	279000	vt	385655	338125	447744	-	-	-	147000	145000	158000	vt	136000	255000	-	-	-	179000	296000	113000	302000	624000	565000	-	-	-	90900	50800	75500	67800	149000	79500	-	-	-
143	432	1.01	1-Octen-3-ol	C8H16O	3391-86-4	1	979.87	982	[43]	P [9,45]	3390000	3170000	2520000	956000	1520000	769000	1921515	2121822	2163275	340000	390000	395000	896000	1750000	2080000	507000	1240000	1120000	249000	649000	592000	794000	1780000	1370000	2760000	2940000	2510000	1110000	837000	1670000	3540000	3500000	3210000	411000	231000	525000	1600000	1480000	1270000
144	450	0.98	6-Methyl-5-hepten-2-ol	C8H16O	4630-06-2	2	996.36	996	[57]	–	443000	1080000	301000	445000	535000	490000	240792	802718	1589284	489000	604000	1070000	487000	2380000	1780000	626000	7490000	568000	112000	479000	554000	163000	208000	vt	vt	vt	vt	307000	287000	159000	3480000	2990000	1560000	vt	vt	vt	vt	vt	vt
145	456	0.81	3-Octanol	C8H18O	589-98-0	1	996.4	1001	[57]	–	346000	143000	109000	51100	63500	86700	165447	123418	124489	168000	vt	75900	257000	173000	148000	507000	1240000	1120000	59000	75700	52700	89600	162000	84500	vt	vt	vt	50900	70900	75700	144000	147000	106000	256000	85300	64500	63800	62800	47700
146	462	0.86	2-Octanol	C8H18O	123-96-6	2	1000.6	1004	[58]	P [11]	1200000	1100000	1170000	873000	1110000	751000	1000097	1274160	1530629	410000	895000	1150000	542000	1290000	1300000	524000	588000	345000	401000	72700	504000	239000	310000	263000	1080000	671000	451000	289000	231000	249000	1030000	1020000	965000	219000	570000	383000	184000	211000	246000
147	504	0.97	2-Ethyl-1-hexanol	C8H18O	104-76-7	2	1029.8	1034	[43]	P [7,9,16]	9420000	8570000	17000000	19200000	20700000	20600000	6371380	8114829	9033190	7910000	8090000	8100000	8630000	9750000	8260000	12500000	15700000	14900000	10300000	6260000	6840000	17800000	18500000	15300000	2000000	1970000	1990000	12700000	13200000	12800000	44200000	43600000	42100000	3360000	3530000	4180000	16600000	15700000	15400000
148	534	0.75	C9 alcohol (m/z 55, 41, 83, 73)	-	-	3	1054.7	-	–	–	34500	24200	39300	-	-	-	vt	vt	vt	vt	vt	vt	43700	38600	38200	53600	202000	52400	vt	vt	vt	270000	431000	247000	37000	28300	38600	208000	116000	209000	59800	41000	36500	303000	219000	153000	237000	160000	128000
149	558	0.63	2-Octen-1-ol	C8H16O	22104-78-5	2	1067.1	1074	[48]	–	4320000	4640000	4950000	6730000	4830000	3400000	5405237	5243814	3711071	4640000	3120000	2080000	3320000	2700000	2380000	4420000	2950000	3210000	2110000	2530000	2360000	3440000	2030000	4690000	4470000	2830000	2480000	3520000	1820000	3060000	5720000	4530000	4320000	7150000	4920000	5020000	3510000	3500000	2730000
150	564	1.05	1-Octanol	C8H18O	111-87-5	1	1071.6	1074	[43]	P[7,9,11,12,16,28,31,38,41]	78200000	72900000	83900000	42300000	46700000	44000000	35010354	39997180	31579362	27600000	25500000	23500000	31200000	30100000	29800000	14700000	13700000	12100000	11500000	10900000	11400000	39200000	37900000	35200000	50800000	48400000	48700000	30300000	32900000	31300000	29600000	29100000	27300000	37300000	37600000	38300000	41200000	40800000	37900000
151	576	1.19	3-Octen-1-ol (m/z 55, 67, 41, 68)	C8H16O	18185-81-4	3	1084.2	-	–		-	-	-	-	-	-	-	-	-	-	-	-	-	-	-	-	-	-	-	-	-	-	-	-	474000	568000	614000	101000	116000	144000	203000	223000	295000	230000	121000	128000	179000	271000	159000
152	606	0.84	2-Nonanol	C9H20O	628-99-9	2	1100.6	1107	[43]	P [7,9]	6930000	3970000	6370000	3850000	3380000	3480000	2705335	3457632	3350237	2750000	2170000	1960000	3520000	3410000	3760000	722000	302000	601000	724000	559000	484000	5550000	4760000	4230000	4830000	4850000	4440000	3650000	3520000	2850000	4660000	2500000	3710000	3500000	3530000	4000000	3550000	3800000	3500000
153	648	0.64	C8 alcohol (m/z 43, 68, 81, 67)	-	-	3	1133.8	-	–	–	-	-	-	-	-	-	306494	534927	278668	862000	409000	617000	260000	267000	528000	693000	487000	729000	465000	714000	986000	-	-	-	706000	536000	720000	-	-	-	-	-	-	-	1440000	-	-	-	-
154	684	1.08	C9 alcohol (m/z 55, 67, 41, 68)	-	-	3	1159.1	-	–	–	1290000	935000	1150000	803000	1600000	930000	357008	493529	481471	487000	459000	485000	806000	816000	736000	455000	418000	326000	285000	273000	289000	1060000	1180000	1300000	1130000	1080000	809000	596000	684000	934000	1190000	780000	1080000	1190000	1070000	1320000	1450000	1160000	1160000
155	702	0.63	2-Nonen-1-ol (isomer)	C9H18O	22104-79-6	2	1167.1	1151	[48]	–	9470000	10700000	12300000	10300000	18000000	8470000	10495070	9975957	8163740	12000000	6390000	5140000	6900000	7850000	4690000	9450000	5950000	7380000	4970000	5780000	5600000	15800000	2750000	10800000	11100000	8220000	7140000	11300000	4060000	6270000	13200000	9930000	9160000	15600000	12500000	10600000	4080000	5050000	6710000
156	708	1	1-Nonanol	C9H20O	143-08-8	2	1171.5	1174	[43]	P [7]	7880000	8920000	9560000	10600000	14100000	12100000	6191352	8207408	6117636	6880000	4700000	3840000	5410000	5670000	5090000	6700000	5900000	7750000	3820000	4530000	3940000	6000000	13400000	11600000	7420000	5420000	5850000	4380000	3870000	4960000	31700000	24300000	20600000	8260000	7110000	6670000	11500000	12100000	8800000
157	708	1.18	6-Nonenol	C9H18O	31502-19-9	2	1171.7	1176	[59]	–	1920000	1130000	2240000	-	-	-	359147	429827	229561	722000	787000	317000	762000	654000	918000	-	-	-	-	-	-	449000	225000	325000	477000	603000	204000	791000	632000	716000	901000	478000	863000	310000	244000	459000	208000	259000	162000
158	714	0.64	2-Nonen-1-ol (isomer)	C9H18O	22104-79-6	2	1175.4	1179	[48]	–	1980000	2160000	2090000	2570000	2060000	2330000	2473744	2578033	1963481	2750000	1560000	988000	1950000	1430000	1430000	2230000	1430000	1250000	1040000	1410000	1090000	2010000	627000	2200000	1850000	1280000	1020000	556000	481000	1180000	1170000	993000	824000	1770000	2620000	1430000	1080000	161000	1740000
159	750	0.81	2-Decanol	C10H22O	1120-06-5	2	1200.6	1207	[18]	P [7,9,12]	1620000	1110000	1790000	478000	392000	322000	-	-	-	270000	308000	200000	259000	270000	245000	-	-	-	-	-	-	649000	250000	328000	557000	573000	642000	286000	192000	263000	328000	227000	194000	253000	348000	326000	339000	359000	215000
160	768	0.86	2-Propyl-1-heptanol	C10H22O	10042-59-8	2	1218	1219	[48]	–	-	-	-	1500000	1470000	1770000	608271	920492	598466	1210000	860000	629000	750000	909000	878000	1130000	1330000	946000	622000	819000	481000	1900000	1500000	1390000	360000	375000	231000	1460000	1020000	1210000	3120000	1930000	1680000	113000	464000	336000	1210000	1320000	1520000
161	840	0.66	2-Decen-1-ol (isomer)	C10H20O	22104-80-9	2	1270	1277	[18]	–	-	-	-	2450000	1070000	1280000	1198675	1436166	1076316	999000	693000	510000	1060000	795000	587000	1160000	689000	732000	868000	731000	753000	-	-	-	2340000	1250000	1040000	1290000	463000	1970000	1910000	482000	1450000	2550000	3350000	1350000	2540000	2970000	1700000
162	840	1.15	9-Decen-1-ol	C10H20O	13019-22-2	2	1269.1	1272	[43]	P [7]	5130000	4130000	6550000	2830000	3060000	3230000	1053943	1011973	1172159	1020000	1320000	1030000	1040000	954000	995000	478000	347000	437000	3370000	5320000	3730000	6440000	7130000	7280000	4720000	4760000	5040000	3740000	4630000	5480000	3540000	3890000	3340000	4540000	4190000	4580000	4030000	4780000	4560000
163	846	0.97	1-Decanol	C10H22O	112-30-1	1	1273.5	1265	[43]	P[7,9,11,12,31,38]	34100000	30100000	39000000	36500000	35000000	32700000	20240168	20977877	20479768	22100000	17200000	14000000	23600000	26700000	23900000	7340000	6350000	5090000	7070000	6850000	6600000	29700000	30400000	29000000	45400000	47000000	46400000	23100000	26600000	26900000	30500000	26000000	22200000	34200000	34700000	32400000	33200000	33600000	30200000
164	852	0.64	2-Decen-1-ol (isomer)	C10H20O	22104-80-9	2	1277.8	1277	[18]	–	7360000	5980000	8760000	10400000	6930000	6180000	6515796	8328957	5341142	8420000	4240000	3480000	4840000	4320000	3850000	6280000	3720000	3090000	3370000	4590000	3730000	4450000	9890000	9850000	6910000	6710000	4380000	4840000	2910000	4130000	8540000	5230000	5340000	7880000	9420000	8160000	7430000	5370000	5370000
165	858	0.89	C10 Alcohol (m/z 67, 45, 81, 41)	-	-	3	1282.5	-	–	–	2800000	2950000	3290000	761000	713000	774000	634727	790690	545156	886000	659000	596000	1450000	1460000	1720000	822000	706000	636000	-	-	-	964000	976000	1040000	1370000	1330000	1300000	672000	704000	932000	2340000	2040000	1680000	677000	720000	735000	1280000	1360000	770000
166	888	0.79	2-Undecanol	C11H24O	1653-30-1	1	1305.1	1309	[43]	P [7,9]	2270000	2080000	2860000	1030000	1200000	918000	526714	563665	617964	807000	714000	457000	1090000	1100000	917000	62300	81500	42100	143000	116000	111000	1440000	1500000	1260000	2630000	2380000	2020000	847000	907000	1020000	1520000	910000	784000	1280000	1120000	1160000	1390000	1720000	955000
167	1014	0.78	2-Dodecanol	C12H26O	10203-28-8	1	1400.7	1413	[25]	–	483000	400000	427000	368000	372000	236000	553242	417250	378995	289000	211000	99000	142000	152000	90800	823000	664000	694000	236000	62300	63400	330000	483000	368000	429000	455000	467000	276000	364000	302000	409000	304000	290000	409000	326000	345000	361000	324000	271000
168	1104	0.92	1-Dodecanol	C12H26O	112-53-8	1	1475.8	1480	[43]	P [7,12,16]	7090000	5210000	7930000	4940000	3760000	2800000	18528276	12806296	15588460	8970000	3250000	5400000	4470000	7280000	3370000	5200000	4090000	5180000	4990000	3310000	5090000	3400000	5740000	4200000	4280000	4340000	4200000	3020000	2700000	3320000	7610000	7900000	5110000	4260000	4790000	4400000	4850000	7620000	4680000
169	1134	0.75	2-Tridecanol	C13H28O	1653-31-2	2	1500.7	1510	[60]	–	185000	116000	270000	259000	424000	350000	426404	433154	269769	1090000	1610000	994000	161000	230000	184000	-	-	-	-	-	-	293000	125000	239000	434000	472000	311000	324000	105000	371000	218000	84100	104000	432000	338000	378000	409000	455000	307000
170	1140	0.81	2-Ethyl-1-dodecanol (m/z 57, 43, 55, 41)	C14H30O	19780-33-7	3	1506.7	-	–	–	1130000	648000	867000	442000	373000	402000	-	-	-	-	-	-	-	-	-	-	-	-	401000	179000	288000	490000	567000	773000	915000	1010000	661000	339000	300000	333000	747000	442000	870000	755000	449000	402000	408000	415000	459000
171	1296	0.75	1-Tetradecanol	C14H30O	112-72-1	2	1684.4	1686	[25]	–	787000	3210000	1260000	731000	1210000	494000	3746995	4531450	2996823	3740000	3380000	2120000	1500000	2410000	1560000	1570000	1600000	1620000	1920000	1280000	1520000	598000	603000	796000	1550000	1920000	1890000	640000	946000	578000	4500000	3590000	996000	441000	452000	878000	1220000	3050000	2000000
172	1410	0.66	1-Hexadecanol	C16H34O	36653-82-4	2	1888.9	1883.9	[14]	–	4820000	2520000	3620000	2370000	1660000	2130000	277833	936003	890939	1100000	1040000	1270000	1000000	836000	1050000	1570000	1860000	792000	1640000	1360000	1530000	977000	846000	955000	1470000	933000	2150000	6330000	1130000	12100000	1440000	1580000	1800000	2480000	2280000	1230000	2060000	3060000	2520000
173	1512	0.69	1-Octadecanol	C18H38O	112-92-5	2	2101.4	2089.8	[61]	–	-	-	-	107000	417000	572000	-	-	-	-	-	-	-	-	-	-	-	-	-	-	-	574000	353000	294000	265000	265000	313000	1820000	1280000	1490000	218000	282000	168000	254000	385000	396000	328000	618000	441000
			Aromatics
174	582	1.99	Dimethylbenzenemethanol	C9H12O	617-94-7	2	1084.7	1086	[18]	–	105000	109000	135000	598000	771000	566000	87976	116746	99626	222000	265000	316000	117000	128000	136000	239000	235000	264000	68600	77300	110000	549000	806000	525000	502000	608000	538000	227000	245000	274000	706000	716000	630000	337000	288000	447000	394000	414000	426000
175	630	2.99	Phenylethanol	C8H10O	60-12-8	1	1118.7	1122	[43]	P[6,7,9,11,12,16,28,38,39,41,45]	2090000000	2120000000	2020000000	1170000000	1380000000	1120000000	958904421	755855902	1095715134	885000000	846000000	1120000000	879000000	983000000	889000000	1190000000	1460000000	953000000	1240000000	1650000000	1140000000	1160000000	1030000000	1640000000	1560000000	1400000000	2300000000	1120000000	1270000000	1430000000	1250000000	1310000000	1540000000	874000000	1080000000	1160000000	1390000000	1330000000	1740000000
176	642	1.28	4-Ethyl-1,3-benzenediol (m/z 123, 138, 43, 67)	C8H10O2	2896-60-8	3	1125.9	-	–	–	166000	190000	215000	37200	69900	40500	75521	94368	94905	76900	72100	72400	66100	48800	55100	145000	124000	157000	63400	50800	86500	31100	53300	29800	41300	44000	54800	23600	25500	24000	62700	49500	44800	44000	28800	43500	27500	43000	53400
177	774	1.52	C10 Aromatic alcohol (m/z 115, 144, 63, 89)	-	-	3	1219.3	-	–	–	792000	539000	740000	440000	572000	674000	1211834	1021578	916841	476000	292000	168000	802000	707000	611000	431000	301000	192000	552000	475000	390000	239000	243000	157000	1980000	2090000	1770000	595000	511000	449000	110000	99000	92600	1580000	1310000	1340000	668000	572000	379000
178	1332	1.93	2,6-Bis(1,1-dimethylethyl)-1,4-benzenediol	C14H22O2	1020-31-1	2	1743.2	1683	[62]	–	3030000	2630000	4160000	219000	221000	302000	736053	1074865	954567	1540000	1440000	1510000	835000	1210000	1090000	1110000	1030000	1000000	902000	744000	653000	205000	210000	128000	137000	169000	173000	136000	127000	106000	300000	272000	235000	118000	130000	137000	87400	94400	119000
			Cyclics
179	762	1.12	4-(1,1-Dimethylethyl)-cyclohexanol	C10H20O	98-52-2	2	1213.9	1214	[63]	–	-	-	-	2530000	2470000	2320000	239847	159825	129440	-	-	-	135000	109000	110000	248000	279000	301000	65300	58100	60700	1570000	1880000	1950000	309000	188000	225000	743000	980000	816000	5620000	6670000	6260000	518000	512000	401000	1910000	1800000	1870000
180	846	1.65	1-Butyl-2-cyclohexen-1-ol (m/z 97, 39, 41, 69)	C10H18O	88116-46-5	3	1274	-	–	–	381000	323000	324000	684000	632000	804000	542429	719346	624116	318000	262000	248000	64600	70600	55300	212000	207000	209000	177000	186000	157000	531000	527000	643000	866000	660000	880000	400000	459000	364000	476000	509000	423000	802000	551000	649000	587000	450000	561000
			Subtotal (GC Peak Area)								4000000000			2030000000			1620000000			1680000000			1620000000			2110000000			2210000000			2120000000			2560000000			1930000000			2190000000			1940000000			2220000000
			Subtotal (%)								41.79			30.48			29.59			28.59			25.67			39.88			34.84			33.86			34.95			34.57			28.29			28.63			29.42
			Sulphur compounds
181	78	0.33	Dimethyl sulfide	C2H6S	75-18-3	2	579.53	526	[64]	P [45]	340000	192000	359000	vt	vt	124000	vt	vt	vt	vt	vt	vt	287000	430000	379000	vt	vt	vt	vt	492000	475000	872000	635000	874000	1070000	1440000	764000	2500000	2380000	1170000	98500	51100	107000	619000	623000	476000	477000	vt	282000
182	132	0.54	Methyl thiolacetate	C3H6OS	1534-08-3	2	674.63	699	[65]	P [45]	305000	195000	225000	308000	86200	84400	vt	199000	167000	72500	59600	62100	486000	197000	173000	155000	101000	69200	173000	153000	150000	-	-	-	506000	141000	vt	372000	226000	324000	-	-	-	-	-	-	181000	346000	70000
183	162	0.58	Dimethyl disulfide	C2H6S2	624-92-0	2	727.32	731	[18]	P [45]	124000	65800	42200	247000	251000	444000	32600	53600	45300	58000	24800	18000	36800	47200	34400	36500	48500	66200	56900	19900	27500	1730000	1120000	1990000	132000	vt	100000	290000	265000	241000	238000	vt	169000	96100	157000	130000	447000	482000	639000
184	330	1.02	1,3-Oxathiane	C4H8OS	646-12-8	2	909.04	913	[43]	–	453000	507000	487000	303000	414000	421000	230000	248000	256000	295000	257000	258000	227000	217000	221000	231000	220000	209000	219000	225000	216000	393000	507000	733000	343000	393000	335000	523000	621000	953000	392000	380000	408000	690000	472000	528000	1320000	1120000	1050000
185	408	0.88	Dimethyl trisulfide	C2H6S3	3658-80-8	2	963.13	969	[48]	P [45]	51800	19000	31200	160000	122000	128000	17800	14400	33900	9390	6890	5310	27900	28100	24800	26300	28100	25400	23200	17100	16000	161000	116000	116000	52300	40300	40100	227000	192000	159000	96800	76600	60900	67200	54600	48400	162000	159000	116000
186	438	1.35	Dihydro-2-methyl-3(2H)-thiophenone	C5H8OS	13679-85-1	2	984.27	989	[43]	–	384000	445000	405000	207000	149000	165000	141000	160000	167000	711000	703000	787000	596000	514000	560000	103000	97100	108000	261000	203000	275000	-	-	-	80900	86300	98700	175000	184000	252000	112000	103000	100000	179000	223000	164000	207000	210000	229000
187	438	2.86	3-(Methylthio)-1-propanol	C4H10OS	505-10-2	2	985.32	989	[43]	P [7,11,38,39,45]	16600000	16000000	17800000	8670000	10200000	11100000	5080000	5090000	5770000	4620000	5210000	6080000	3710000	3260000	3270000	3830000	3390000	3680000	2860000	3290000	3820000	6440000	5670000	5440000	8440000	7610000	8210000	3330000	3790000	2980000	9100000	7920000	8740000	3170000	6020000	6140000	4660000	5250000	3560000
188	456	0.74	5-Methyl-2-furanmethanethiol	C6H8OS	59303-05-8	2	996.35	995	[66]	–	1280000	1260000	1210000	1020000	1220000	1160000	2900000	2810000	2860000	2960000	2620000	1960000	719000	691000	624000	1060000	946000	966000	941000	795000	818000	961000	524000	567000	3110000	2480000	2630000	763000	646000	556000	897000	678000	722000	1300000	1080000	1010000	764000	602000	603000
189	606	0.99	Ethyl 3-(methylthio)propanoate	C6H12O2S	13327-56-5	2	1100.7	1098	[46]	–	867000	614000	613000	248000	331000	290000	254000	296000	326000	273000	338000	372000	219000	263000	361000	274000	244000	266000	145000	135000	229000	422000	513000	336000	256000	180000	280000	249000	301000	276000	309000	348000	376000	297000	363000	350000	315000	334000	372000
190	642	1.09	3-(Methylthio)-propyl acetate	C6H12O2S	16630-55-0	2	1125.8	1125	[18]	–	20000000	19800000	22100000	8110000	9640000	10000000	8520000	9190000	10000000	8660000	8990000	9730000	5560000	5640000	5720000	12700000	13100000	13800000	12200000	12600000	13800000	4430000	4840000	4590000	7070000	7370000	7640000	3840000	3810000	4050000	16600000	16400000	16900000	4610000	5490000	5190000	4870000	4910000	4530000
191	726	0.7	S-Ethyl thiooctanoate (m/z 57, 43, 41, 127)	C10H20OS	2432-84-0	3	1183.8	-	–	–	3910000	2930000	4010000	1370000	1330000	1140000	926000	927000	908000	246000	193000	177000	1430000	1380000	1180000	797000	662000	490000	994000	994000	891000	2620000	2480000	2090000	2840000	3020000	2900000	2510000	2430000	2490000	367000	620000	478000	1840000	1710000	1680000	1480000	1310000	1250000
192	780	2.03	Benzothiazole	C7H5NS	95-16-9	2	1224.3	1230	[43]	–	290000	397000	318000	654000	622000	670000	267000	288000	320000	437000	418000	503000	290000	264000	268000	376000	371000	376000	182000	222000	309000	556000	607000	669000	127000	182000	124000	373000	420000	436000	1570000	1630000	1480000	326000	330000	346000	710000	794000	680000
193	816	0.67	2-(1,1-Dimethylethyl)-thiophene	C8H12S	1689-78-7	2	1250.5	1251	[43]	–	537000	677000	239000	41400	65400	137000	191000	237000	220000	211000	174000	200000	279000	378000	337000	114000	50800	75300	161000	174000	211000	370000	301000	382000	145000	326000	405000	612000	473000	412000	1130000	673000	712000	437000	573000	511000	329000	295000	331000
			Subtotal (GC Peak Area)								45400000			23900000			19700000			19200000			13400000			19700000			19600000			18000000			23600000			15300000			30000000			15800000			15100000
			Subtotal (%)								0.47			0.36			0.36			0.33			0.21			0.37			0.31			0.29			0.32			0.27			0.39			0.23			0.2
			Volatile phenols
194	588	2.89	Guaicol	C7H8O2	90-05-1	1	1089.5	1095	[43]	P [31]	393000	455000	410000	1530000	1460000	1550000	216000	292000	341000	702000	589000	599000	412000	426000	458000	369000	237000	322000	257000	342000	279550	998000	1400000	1150000	445000	253000	589000	445000	546000	366000	2000000	2190000	2060000	351000	416000	678000	1080000	1130000	901000
195	858	2.01	4-Ethylguaiacol	C9H12O2	2785-89-9	2	1283.3	1290	[3]	P [38]	2140000	2170000	2460000	2120000	2080000	2200000	247000	273000	302000	607000	604000	671000	253000	313000	308000	97700	86800	95600	142000	138000	161000	85600	81700	137000	627000	606000	650000	179000	218000	248000	969000	1120000	1040000	458000	501000	496000	531000	586000	562000
196	900	2.99	4-Vinylguaiacol	C9H10O2	7786-61-0	2	1315.9	1333	[43]	P [7,11,12,38,39]	58100000	56200000	64000000	29000000	30600000	29600000	19300000	21400000	21400000	24000000	22000000	24700000	17300000	20100000	19200000	13100000	11700000	11400000	13700000	15000000	14600000	13800000	13700000	17000000	27900000	28300000	31300000	20700000	24100000	23700000	34400000	36300000	33100000	30400000	28100000	33400000	31000000	32700000	31000000
			Subtotal (GC Peak Area)								62100000			33400000			21200000			24800000			19600000			12500000			14900000			16100000			30200000			23500000			37700000			31600000			33200000
			Subtotal (%)								0.65			0.5			0.39			0.42			0.31			0.24			0.23			0.26			0.41			0.42			0.49			0.47			0.44
			Monoterpenic compounds
			Alcohol-type
197	504	0.51	1,8-Cineole	C10H18O	470-82-6	1	1030	1039	[1]	P [2]	Data available in Supplementary Information on https://doi.org/10.1016/j.foodres.2018.07.048
198	564	0.79	Dihydromyrcenol	C10H20O	18479-58-8	2	1071	1068	[3]	P [2]
199	600	0.67	Dihydrolinalool	C10H22O	78-69-3	2	1096	1097	[4]	P [2]
200	606	0.91	Linalool	C10H18O	78-70-6	1	1101	1101	[5]	P [2,6–9]
201	606	0.93	Monoterpenic compound (m/z 93, 91, 77, 79)	–	–	3	1101	–	–	P [2]
202	606	1.06	Hotrienol	C10H16O	29957-43-5	2	1105	1101	[10]	P [2]
203	624	0.97	Fenchol	C10H18O	1632-73-1	2	1113	1118	[1]	P [2,9,11]
204	636	1.02	Myrcenol	C10H18O	543-39-5	2	1122	1103	[1]	P [2,12]
205	660	1.11	Pinocarvoneol	C10H16O	5947-36-4	2	1138	1142	[1]	P [2]
206	666	0.76	p-Menthan-4-ol (m/z 43, 95, 113, 67)	C10H20O	470-65-5	3	1142	–	–	P [2]
207	666	0.84	Dihydro-α-terpineol (isomer)	C10H20O	498-81-7	2	1142	1152	[13]	P [2]
208	666	0.86	Isopulegol	C10H18O	89-79-2	2	1146	1147	[1]	P [2]
209	666	1.11	2-Methyl-6-methylene-2,7-octadien-4-ol	C10H16O	14434-41-4	2	1142	1150	[14]	P [2]
210	690	0.87	Dihydro-α-terpineol (isomer)	C10H20O	498-81-7	2	1159	1152	[13]	P [2]
211	690	1.28	2,6-Dimethyl-1,5,7-octatrien-3-ol (m/z 41, 49, 43, 67)	C10H16O	29414-56-0	3	1163	–	–	P [2]
212	696	0.87	Monoterpenic compound (m/z 71, 55, 41, 95)	–	–	3	1163	–	–	P [2]
213	696	1.04	Monoterpenic compound (m/z 41, 69, 43, 93)	–	–	3	1163	–	–	P [2]
214	696	1.15	Borneol	C10H18O	507-70-0	1	1163	1166	[3]	P [2,11]
215	708	0.95	Menthol	C10H20O	1490-04-6	1	1172	1174	[10]	P [2]
216	714	0.86	(-)-Terpinen-4-ol	C10H18O	20126-76-5	1	1176	1180	[15]	P [2,9,16]
217	732	1.04	α-Terpineol	C10H18O	98-55-5	1	1192	1195	[3]	P [2,6]
218	774	1.22	7-Methyl-3-methylene-6-octen-1-ol	C10H18O	13066-51-8	2	1219	1222	[14]	P [2]
219	792	1.09	(+)-b-Citronellol #	C10H20O	106-22-9	1	1233	1234	[17]	P[2,6,7,9,12]
220	792	1.22	Nerol #	C10H18O	106-25-2	1	1233	1237	[18]	P [2]
221	822	1.22	Geraniol #	C10H18O	106-24-1	1	1256	1266	[18]	P [2,6,7,9,19]
222	846	1.35	Shisool (m/z 79, 93, 67, 41) (isomer)	C10H18O	22451-48-5	3	1275	–	–	P [2]
223	864	1.38	Shisool (m/z 79, 93, 67, 41) (isomer)	C10H18O	22451-48-5	3	1288	–	–	P [2]
			Aldehyde-type
224	696	0.77	Monoterpenic compound (m/z 109, 151, 43, 39)	–	–	3	1163	–	–	P [2]
225	738	0.9	Myrtenal	C10H14O	564-94-3	2	1192	1204	[1]	P [2]
226	768	0.81	p-Menth-1-en-9-al	C10H16O	29548-14-9	2	1218	1219	[1]	P [2]
227	798	0.87	Citral (isomer)	C10H16O	5392-40-5	1	1237	1244	[10]	P [2,8]
228	840	0.92	Citral (isomer)	C10H16O	5392-40-5	1	1269	1272	[10]	P [2,8]
			Esters-type
229	822	0.63	Linalyl acetate	C12H20O2	115-95-7	2	1255	1257	[20]	P [2]
230	858	0.7	Methyl geraniate (isomer)	C11H18O2	2349-14-6	1	1282	1324	[21]	P [2,12]
231	864	0.65	Bornyl acetate	C12H20O2	76-49-3	2	1287	1288	[22]	P [2]
232	906	0.75	Lyratyl acetate	C12H18O2	79549-21-6	2	1319	1321	[23]	P [2]
233	912	0.74	Methyl geraniate (isomer)	C11H18O2	2349-14-6	1	1323	1324	[21]	P [2,12]
234	942	0.77	Carveol acetate (isomer)	C12H18O2	97-42-7	2	1346	1339	[24]	P [2]
235	948	0.65	Citronellol acetate	C12H22O2	150-84-5	2	1353	1354	[4]	P [2,12]
236	954	0.69	Monoterpenic compound (m/z 69, 43, 41, 93)	–	–	3	1358	–	–	P [2]
237	966	0.7	Neryl acetate	C12H20O2	141-12-8	2	1364	1362	[25]	P [2,6]
238	978	0.81	Carveol acetate (isomer)	C12H18O2	97-42-7	2	1373	1339	[24]	P [2]
239	990	0.72	Geranyl acetate	C12H20O2	105-87-3	2	1382	1382	[18]	P [2,19]
240	1038	0.89	Verdyl acetate (m/z 66, 43, 67, 82)	C12H16O2	5413-60-5	3	1421	–	–	P [2]
241	1044	0.71	Nopyl acetate	C13H20O2	128-51-8	2	1426	1424	[26]	P [2]
242	1050	0.85	Monoterpenic compound (m/z 43, 67, 79, 39)	–	–	3	1431	–	–	P [2]
243	1146	0.61	Geranyl isobutanoate	C14H24O2	2345-26-8	2	1512	1516	[27]	P [2]
			Hydrocarbon-type
244	366	0.41	α-Pinene	C10H16	80-56-8	1	934	932	[3]	P [2,19]
245	384	0.42	Camphene	C10H16	79-92-5	2	946	960	[1]	P [2,8]
246	444	0.49	β-Myrcene	C10H16	123-35-3	1	988	988	[5]	P [2,6,7,9,12]
247	462	0.49	α-Phellandrene	C10H16	99-83-2	2	1000	1007	[15]	P [2]
248	480	0.49	α-Terpinene	C10H16	99-86-5	1	1013	1021	[15]	P [2,8]
249	498	0.5	R (+)-Limonene	C10H16	5989-27-5	1	1025	1028	[3]	P [2,7,8,19]
250	528	0.53	β-Ocimene	C10H16	13877-91-3	2	1046	1050	[20]	P [2,8,9,28]
251	540	0.52	γ-Terpinene	C10H16	99-85-4	1	1055	1061	[15]	P [2]
252	588	0.53	α-Terpinolene	C10H16	586-62-9	2	1088	1090	[18]	P [2]
253	702	0.54	Monoterpenic compound (m/z 43, 91, 93, 79)	–	–	3	1167	–	–	P [2]
254	762	0.53	Monoterpenic compound (m/z 93, 91, 77, 79)	–	–	3	1213	–	–	P [2]
255	792	0.59	Monoterpenic compound (m/z 137, 91, 165, 119)	–	–	3	1232	–	–	P [2]
256	798	0.59	Monoterpenic compound (m/z 93, 121, 91, 136)	–	–	3	1237	–	–	P [2]
			Ketone-type
257	582	0.67	Fenchone	C10H16O	7787-20-4	2	1084	1093	[1]	P [2]
258	654	0.95	β-Pinone	C9H14O	24903-95-5	2	1134	1139	[22]	P [2]
259	666	0.79	(1R)-(+)-Camphor	C10H16O	464-49-3	1	1142	1147	[1]	P [2]
260	678	0.69	p-Menthan-3-one (isomer)	C10H18O	10458-14-7	2	1151	1166	[29]	P [2]
261	690	0.76	Pinocamphone (isomer)	C10H16O	18358-53-7	2	1159	1162	[1]	P [2]
262	690	0.86	Pinocarvone	C10H14O	30460-92-5	2	1159	1164	[1]	P [2]
263	696	0.71	p-Menthan-3-one (isomer)	C10H18O	10458-14-7	2	1163	1166	[29]	P [2]
264	708	0.78	Pinocamphone (isomer)	C10H16O	18358-53-7	2	1171	1167	[15]	P [2]
265	738	0.86	Dihydrocarvone	C10H16O	7764-50-3	2	1192	1201	[15]	P [2]
266	804	1.02	(+)-Carvone	C10H14O	2244-16-8	1	1242	1244	[10]	P [2]
267	810	0.91	p-Menth-4-en-3-one	C10H16O	5113-66-6	2	1246	1251	[30]	P [2]
268	822	0.98	p-Menth-1-en-3-one	C10H16O	89-81-6	2	1251	1256	[14]	P [2]
			Oxide-type
269	564	0.76	Linalool oxide (isomer)	C10H18O2	60047-17-8	1	1071	1074	[10]	P [2,11]
270	588	0.78	Linalool oxide (isomer)	C10H18O2	60047-17-8	1	1088	1094	[10]	P [2,11]
271	618	0.58	Rose oxide (isomer)	C10H18O	16409-43-1	1	1109	1114	[10]	P [2,11]
272	642	0.58	Rose oxide (isomer)	C10H18O	16409-43-1	1	1130	1131	[10]	P [2,11]
273	678	0.61	Monoterpenic compound (m/z 69, 139, 41, 55)	–	–	3	1155	–	–	P [2]
274	678	0.67	Nerol oxide	C10H16O	1786-08-9	2	1155	1154	[3]	P [2]
			Miscellaneous
275	396	0.43	Monoterpenic compound (m/z 43, 55, 93, 41)	–	–	3	954	–	–	P [2]
276	606	1.1	Monoterpenic compound (m/z 43, 91, 79, 77)	–	–	3	1105	–	–	P [2]
277	630	0.87	Monoterpenic compound (m/z 93, 91, 77, 43)	–	–	3	1117	–	–	P [2]
278	660	0.99	Monoterpenic compound (m/z 93, 91, 77, 43)	–	–	3	1142	–	–	P [2]
279	720	0.5	Monoterpenic compound (m/z 93, 43, 91, 77)	–	–	3	1180	–	–	P [2]
280	720	0.54	Monoterpenic compound (m/z 91, 119, 39, 100)	–	–	3	1180	–	–	P [2]
281	744	1.56	Monoterpenic compound (m/z 91, 119, 137, 39)	–	–	3	1197	–	–	P [2]
282	774	1.02	Monoterpenic compound (m/z 41, 67, 82, 69)	–	–	3	1223	–	–	P [2]
283	792	0.69	Monoterpenic compound (m/z 59, 83, 55, 43)	–	–	3	1232	–	–	P [2]
284	828	0.61	Monoterpenic compound (m/z 73, 93, 45, 121)	–	–	3	1260	–	–	P [2]
285	948	0.7	Monoterpenic compound (m/z 93, 43, 121, 67)	–	–	3	1351	–	–	P [2]
286	1020	0.71	Monoterpenic compound (m/z 79, 43, 107, 91)	–	–	3	1406	–	–	P [2]
287	1026	0.77	Monoterpenic compound (m/z 43, 79, 93, 104)	–	–	3	1411	–	–	P [2]
			Subtotal (GC Peak Area)
			Subtotal (%)
			Sesquiterpenic compounds
			Alcohol-type
288	1206	0.76	Nerolidol	C15H26O	7212-44-4	1	1571	1573	[3]	P [2,7,12,31]	Data available in Supplementary Information on https://doi.org/10.1016/j.foodres.2018.07.048
289	1212	0.79	Caryophyllenyl alcohol	C15H26O	–	2	1577	1569	[32]	P [2,7,9]
290	1242	0.82	m/z 43, 67, 82, 41	–	–	3	1610	–	–	P [2]
291	1260	0.68	Cubenol	C15H26O	21284-22-0	2	1634	1643	[33]	P [2]
292	1272	0.75	τ-Cadinol	C15H26O	5937-11-1	2	1651	1651	[10]	P [2,6]
293	1284	0.79	α-Cadinol	C15H26O	481-34-5	2	1668	1652	[21]	P [2,6,7,9]
294	1302	0.71	α-Bisabolol	C15H26O	515-69-5	1	1693	1692	[33]	P [2,7]
295	1314	0.77	Juniper camphor	C15H26O	473-04-1	2	1711	1709	[14]	P [2]
296	1326	0.83	trans, trans-Farnesol	C15H26O	106-28-5	1	1731	1713	[33]	P [2,7]
297	1428	0.95	Sesquiterpenic compound (m/z 69, 41, 81, 93)	–	–	3	1927	–	–	P [2]
			Ester-type
298	1356	0.64	Cedryl acetate	C17H28O2	77-54-3	2	1781	1780	[14]	P [2]
			Hydrocarbon-type
299	972	0.5	Sesquiterpenic compound (m/z 93, 41, 91, 79)	–	–	3	1369	–	–	P [2]
300	978	0.49	α-Copaene	C15H24	3856-25-5	1	1373	1370	[15]	P [2]
301	1020	0.54	Longifolene	C15H24	475-20-7	2	1406	1395	[33]	P [2]
302	1038	0.53	β-Caryophyllene	C15H24	87-44-5	1	1420	1420	[5]	P [2,6,9,19]
303	1044	0.54	Sesquiterpenic compound (m/z 91, 105, 161, 77)	–	–	3	1426	–	–	P [2]
304	1080	0.55	β-Farnesene	C15H24	77129-48-7	2	1456	1456	[5]	P [2,7,19]
305	1080	0.57	α-Caryophyllene (α-Humulene)	C15H24	6753-98-6	1	1456	1456	[5]	P [2,6,9]
306	1104	0.56	γ-Gurjunene	C15H24	22567-17-5	2	1476	1472	[4]	P [2]
307	1116	0.59	α-Selinene	C15H24	473-13-2	2	1486	1491	[33]	P [2,6]
308	1128	0.57	α-Bergamotene	C15H24	17699-05-7	2	1496	1492	[34]	P [2]
309	1128	0.58	(+)-Valencene	C15H24	4630-07-3	1	1496	1491	[4]	P [2,8]
310	1146	0.58	α-Farnesene	C15H24	502-61-4	2	1512	1505	[34]	P [2,7]
311	1146	0.59	γ-Cadinene	C15H24	39029-41-9	2	1512	1513	[21]	P [2,6]
312	1164	0.57	δ-Cadinene	C15H24	483-76-1	2	1530	1524	[21]	P [2,6,9]
313	1164	0.65	Calamenene	C15H22	72937-55-4	2	1530	1528	[10]	P [2,6]
314	1176	0.6	Sesquiterpenic compound (m/z 105, 41, 91, 43)	–	–	3	1542	–	–	P [2]
315	1182	0.7	α-Calacorene	C15H20	21391-99-1	2	1548	1544	[33]	P [2,7]
316	1266	0.74	Sesquiterpenic compound (m/z 105, 91, 41, 119)	–	–	3	1643	–	–	P [2]
317	1296	0.76	Cadalene	C15H18	483-78-3	2	1684	1671	[21]	P [2,8,9]
			Oxide-type
318	1194	0.7	Caryophyllene oxide (isomer)	C15H24O	1139-30-6	2	1560	1601	[15]	P [2,6,9]
319	1224	0.7	Caryophyllene oxide (isomer)	C15H24O	1139-30-6	2	1589	1601	[15]	P [2,6,9]
320	1248	0.69	Humulene epoxide II	C15H24O	19888-34-7	2	1618	1609	[21]	P [2,6]
321	1266	0.93	Sesquiterpenic compound (m/z 41, 67, 91, 39)	–	–	3	1643	–	–	P [2]
			Miscellaneous
322	1164	0.78	Sesquiterpenic compound (m/z 91, 43, 41, 79)	–	–	3	1530	–	–	P [2]
323	1236	0.7	Sesquiterpenic compound (m/z 93, 43, 41, 80)	–	–	3	1601	–	–	P [2]
324	1254	0.78	Sesquiterpenic compound (m/z 43, 41, 93, 91)	–	–	3	1626	–	–	P [2]
325	1272	0.63	Sesquiterpenic compound (m/z 43, 41, 105, 109)	–	–	3	1651	–	–	P [2]
326	1278	0.8	Sesquiterpenic compound (m/z 43, 91, 41, 67)	–	–	3	1659	–	–	P [2]
327	1284	0.9	Sesquiterpenic compound (m/z 41, 91, 39, 77)	–	–	3	1668	–	–	P [2]
328	1308	0.65	Sesquiterpenic compound (m/z 43, 135, 41, 91)	–	–	3	1701	–	–	P [2]
329	1392	0.6	Sesquiterpenic compound (m/z 69, 41, 43, 55)	–	–	3	1851	–	–	P [2]
			Subtotal (GC Peak Area)
			Subtotal (%)
			Total								9570000000			6660000000			5480000000			5880000000			6310000000			5290000000			6340000000			6260000000			7330000000			5570000000			7720000000			6770000000			7530000000
											267			265			273			259			270			263			260			254			270			277			264			265			283
a Retention times for first (1tR) and second (2tR) dimensions in seconds.
bLevel of metabolite identification according to Sumner et al. (2007). (1) Identified compounds; (2) Putatively annotated compounds; (3) Putatively characterized compound classes; (4) Unknown compounds.
c RI: Retention Index obtained through the modulated chromatogram
d RI, Retention Index reported in the literature for Equity-5 GC column or equivalents
1	Jalali, H.T.; Petronilho, S.; José, J.; Coimbra, M.A.; Domingues, M.R.M.; Ebrahimian, Z.J.; Silvestre, A.J.D.; Rocha, S.M. Deeper insight into the monoterpenic composition of Ferula gummosa oleo-gum-resin from Iran. Ind. Crop. Prod. 2012, 36, 500–507.
2	Martins, C.; Brandão, T.; Almeida, A.; Rocha, S.M. Unveiling the lager beer volatile terpenic compounds. Food Res. Int. 2018, 114, 199–207, doi:10.1016/j.foodres.2018.07.048.
3	Santos, M.C.; Nunes, C.; Rocha, M.A.M.; Rodrigues, A.; Rocha, S.M.; Saraiva, J.A.; Coimbra, M.A. Impact of high pressure treatments on the physicochemical properties of a sulphur dioxide-free white wine during bottle storage: Evidence for Maillard reaction acceleration. Innov. Food Sci. Emerg. Technol. 2013, 20, 51–58.
4	Pino, J.A.; Mesa, J.; Munoz, Y.; Marti, M.P.; Marbot, R. Volatile components from mango (Mangifera indica L.) cultivars. J. Agric. Food Chem. 2005, 53, 2213–2223.
5	Martins, C.; Brandão, T.; Almeida, A.; Rocha, S.M. Insights on beer volatile profile: Optimization of solid-phase microextraction procedure taking advantage of the comprehensive two-dimensional gas chromatography structured separation. J. Sep. Sci. 2015, 38, 2140–2148, doi:10.1002/jssc.201401388.
6	Dresel, M.; Praet, T.; Van Opstaele, F.; Van Holle, A.; Naudts, D.; De Keukeleire, D.; De Cooman, L.; Aerts, G. Comparison of the analytical profiles of volatiles in single-hopped worts and beers as a function of the hop variety. BrewingScience 2015, 68, 8–28.
7	Tsuji, H.; Mizuno, A. Volatile compounds and the changes in their concentration levels during storage in beers containing varying malt concentrations. J. Food Sci. 2010, 75, C79-84, doi:10.1111/j.1750-3841.2009.01428.x.
8	Castro, L.F.; Ross, C.F.; Vixie, K.R. Optimization of a solid phase dynamic extraction (SPDE) method for beer volatile profiling. Food Anal. Methods 2015, 8, 2115–2124, doi:10.1007/s12161-015-0104-z.
9	Giannetti, V.; Boccacci Mariani, M.; Torrelli, P.; Marini, F. Flavour component analysis by HS-SPME/GC–MS and chemometric modeling to characterize Pilsner-style Lager craft beers. Microchem. J. 2019, 149, 103991, doi:10.1016/j.microc.2019.103991.
10	Salvador, Â.C.; Rudnitskaya, A.; Silvestre, A.J.D.; Rocha, S.M. Metabolomic-based strategy for fingerprinting of Sambucus nigra L. berry volatile terpenoids and norisoprenoids: influence of ripening and cultivar. J. Agric. Food Chem. 2016, 64, 5428–5438.
11	Riu-Aumatell, M.; Miró, P.; Serra-Cayuela, A.; Buxaderas, S.; López-Tamames, E. Assessment of the aroma profiles of low-alcohol beers using HS-SPME–GC-MS. Food Res. Int. 2014, 57, 196–202, doi:10.1016/j.foodres.2014.01.016.
12	Rendall, R.; Reis, M.S.; Pereira, A.C.; Pestana, C.; Pereira, V.; Marques, J.C. Chemometric analysis of the volatile fraction evolution of Portuguese beer under shelf storage conditions. Chemom. Intell. Lab. Syst. 2015, 142, 131–142, doi:/10.1016/j.chemolab.2015.01.015.
13	Flamini, G.; Cioni, P.L.; Morelli, I. Use of solid-phase micro-extraction as a sampling technique in the determination of volatiles emitted by flowers, isolated flower parts and pollen. J. Chromatogr. A 2003, 998, 229–233.
14	Andriamaharavo, N.R. Retention Data. NIST Mass Spectrometry Data Center. NIST Mass Spectrom. Data Cent. 2014.
15	Petronilho, S.; Rocha, S.M.; Ramírez-Chávez, E.; Molina-Torres, J.; Rios-Chavez, P. Assessment of the terpenic profile of Callistemon citrinus (Curtis) Skeels from Mexico. Ind. Crops Prod. 2013, 46, 369–379.
16	Harayama, K.; Hayase, F.; Kato, H. New method for analyzing the volatiles in beer. Biosci. Biotechnol. Biochem. J. 1994, 58, 2246–2247, doi:10.1080/bbb.58.2246.
17	Rocha, S.M.; Coelho, E.; Zrostlíková, J.; Delgadillo, I.; Coimbra, M.A. Comprehensive two-dimensional gas chromatography with time-of-flight mass spectrometry of monoterpenoids as a powerful tool for grape origin traceability. J. Chromatogr. A 2007, 1161, 292–299.
18	Alves, Z.; Melo, A.; Figueiredo, A.R.; Coimbra, M.A.; Gomes, A.C.; Rocha, S.M. Exploring the Saccharomyces cerevisiae volatile metabolome: indigenous versus commercial strains. PLoS One 2015, 10, e0143641, doi:10.1371/journal.pone.0143641.
19	Hao, J.; Dong, J.; Yin, H.; Yan, P.; Ting, P.L.; Li, Q.; Tao, X.; Yu, J.; Chen, H.; Li, M. Optimum method of analyzing hop derived aroma compounds in beer by headspace solid-phase microextraction (SPME) with GC/MS and their evolutions during chinese lager brewing process. Am. Soc. Brew. Chem. 2014, 72, 261–270, doi:10.1094/ASBCJ-2014-1021-01.
20	Shellie, R.; Mondello, L.; Marriott, P.; Dugo, G. Characterisation of lavender essential oils by using gas chromatography-mass spectrometry with correlation of linear retention indices and comparison with comprehensive two-dimensional gas chromatography. J. Chromatogr. A 2002, 970, 225–234.
21	Nance, M.R.; Setzer, W.N. Volatile components of aroma hops (Humulus lupulus L.) commonly used in beer brewing. J. Brew. Distill. 2011, 2, 16–22.
22	Kallio, M.; Jussila, M.; Rissanen, T.; Anttila, P.; Hartonen, K.; Reissell, A.; Vreuls, R.; Adahchour, M.; Hyötyläinen, T. Comprehensive two-dimensional gas chromatography coupled to time-of-flight mass spectrometry in the identification of organic compounds in atmospheric aerosols from coniferous forest. J. Chromatogr. A 2006, 1125, 234–243.
23	Cardeal, Z.L.; Gomes da Silva, M.D.R.; Marriott, P.J. Comprehensive two-dimensional gas chromatography/mass spectrometric analysis of pepper volatiles. Rapid Commun. mass Spectrom. 2006, 20, 2823–2836.
24	Stashenko, E.E.; Jaramillo, B.E.; Martínez, J.R. Comparación de la composición química y de la actividad antioxidante in vitro de los metabolitos secundarios volátiles de plantas de la familia verbenaceae. Rev. Acad. Colomb. Cienc. 2003, 27, 579–597.
25	Silva, I.; Coimbra, M.A.; Barros, A.S.; Marriott, P.J.; Rocha, S.M. Can volatile organic compounds be markers of sea salt? Food Chem. 2015, 169, 102–113.
26	Adams, R.P. Identification of essential oil components by gas chromatography/mass spectrometry; Allured Publishing Corporation, Carol Stream, IL, 1995;
27	Bouzouita, N.; Kachouri, F.; Hamdi, M.; Chaabouni, M.M. Antimicrobial activity of essential oils from Tunisian aromatic plants. Flavour Fragr. J. 2003, 18, 380–383.
28	Alves, V.; Gonçalves, J.; Figueira, J.A.; Ornelas, L.P.; Branco, R.N.; Câmara, J.S.; Pereira, J.A.M. Beer volatile fingerprinting at different brewing steps. Food Chem. 2020, 326, 126856, doi:10.1016/j.foodchem.2020.126856.
29	Jalali-Heravi, M.; Zekavat, B.; Sereshti, H. Characterization of essential oil components of Iranian geranium oil using gas chromatography-mass spectrometry combined with chemometric resolution techniques. J. Chromatogr. A 2006, 1114, 154–163.
30	Zhao, Y.; Li, J.; Xu, Y.; Duan, H.; Fan, W.; Zhao, G. Extraction, preparation and identification of volatile compounds in Changyu XO brandy. Chinese J. Chromatogr. 2008, 26, 212–222.
31	Ruvalcaba, J.E.; Durán-Guerrero, E.; Barroso, C.G.; Castro, R. Development of head space sorptive extraction method for the determination of volatile compounds in beer and comparison with stir bar sorptive extraction. Foods 2020, 9, 1–12, doi:10.3390/foods9030255.
32	Carasek, E.; Pawliszyn, J. Screening of tropical fruit volatile compounds using solid-phase microextraction (SPME) fibers and internally cooled SPME fiber. J. Agric. Food Chem. 2006, 54, 8688–8696.
33	Jalali, H.T.; Petronilho, S.; Villaverde, J.J.; Coimbra, M.A.; Domingues, M.R.M.; Ebrahimian, Z.J.; Silvestre, A.J.D.; Rocha, S.M. Assessment of the sesquiterpenic profile of Ferula gummosa oleo-gum-resin (galbanum) from Iran. Contributes to its valuation as a potential source of sesquiterpenic compounds. Ind. Crops Prod. 2013, 44, 185–191.
34	Petronilho, S.; Maraschin, M.; Delgadillo, I.; Coimbra, M.A.; Rocha, S.M. Sesquiterpenic composition of the inflorescences of Brazilian chamomile (Matricaria recutita L.): Impact of the agricultural practices. Ind. Crops Prod. 2011, 34, 1482–1490.
35	Salvador, Â.C.; Silvestre, A.J.D.; Rocha, S.M. Unveiling elderflowers (Sambucus nigra L.) volatile terpenic and norisoprenoids profile: effects of different postharvest conditions. Food Chem. 2017, 229, 276–285.
36	Mahattanatawee, K.; Goodner, K.L.; Baldwin, E.A. Volatile constituents and character impact compounds of selected Florida’s tropical fruit. Proc. Fla. State Hort. Soc. 2005, 118, 414–418.
37	Lin, J.; Dai, Y.; Guo, Y.; Xu, H.; Wang, X. Volatile profile analysis and quality prediction of Longjing tea (Camellia sinensis) by HS-SPME/GC-MS. J. Zhejiang Univ. - Sci. B 2012, 13, 972–980.
38	Rodriguez-Bencomo, J.J.; Muñoz-González, C.; Martín-Álvarez, P.J.; Lázaro, E.; Mancebo, R.; Castañé, X.; Pozo-Bayón, M.A. Optimization of a HS-SPME-GC-MS procedure for beer volatile profiling using response surface methodology: application to follow aroma stability of beers under different storage conditions. Food Anal. Methods 2012, 5, 1386–1397, doi:10.1007/s12161-012-9390-x.
39	Fritsch, H.T.; Schieberle, P. Identification based on quantitative measurements and aroma recombination of the character impact odorants in a Bavarian Pilsner-type beer. J. Agric. Food Chem. 2005, 53, 7544–7551, doi:10.1021/jf051167k.
40	Silva, I.; Rocha, S.M.; Coimbra, M.A.; Marriott, P.J. Headspace solid-phase microextraction combined with comprehensive two-dimensional gas chromatography time-of-flight mass spectrometry for the determination of volatile compounds from marine salt. J. Chromatogr. A 2010, 1217, 5511–5521.
41	Rossi, S.; Sileoni, V.; Perretti, G.; Marconi, O. Characterization of the volatile profiles of beer using headspace solid-phase microextraction and gas chromatography-mass spectrometry. J. Sci. Food Agric. 2014, 94, 919–928, doi:10.1002/jsfa.6336.
42	Ferhat, M.A.; Tigrine-Kordjani, N.; Chemat, S.; Meklati, B.Y.; Chemat, F. Rapid extraction of volatile compounds using a new simultaneous microwave distillation: solvent extraction device. Chromatographia 2007, 65, 217–222.
43	Martins, C.; Brandão, T.; Almeida, A.; Rocha, S.M. Metabolomics strategy for the mapping of volatile exometabolome from Saccharomyces spp. widely used in the food industry based on comprehensive two-dimensional gas chromatography. J. Sep. Sci. 2017, 40, 2228–2237.
44	Zhao, J.; Liu, J.; Zhang, X.; Liu, Z.; Tsering, T.; Zhong, Y.; Nan, P. Chemical composition of the volatiles of three wild Bergenia species from western China. Flavour Fragr. J. 2006, 21, 431–434.
45	Vera, L.; Aceña, L.; Guasch, J.; Boqué, R.; Mestres, M.; Busto, O. Characterization and classification of the aroma of beer samples by means of an MS e-nose and chemometric tools. Anal. Bioanal. Chem. 2011, 399, 2073–2081, doi:10.1007/s00216-010-4343-y.
46	Beaulieu, J.C.; Grimm, C.C. Identification of volatile compounds in cantaloupe at various developmental stages using solid phase microextraction. J. Agric. Food Chem. 2001, 49, 1345–1352.
47	Castro, L.F.; Ross, C.F. Determination of flavour compounds in beer using stir-bar sorptive extraction and solid-phase microextraction. J. Inst. Brew. 2015, 121, 197–203, doi:10.1002/jib.219.
48	Costa, C.P.; Silva, D.G.; Rudnitskaya, A.; Almeida, A.; Rocha, S.M. Shedding light on Aspergillus niger volatile exometabolome. Sci. Rep. 2016, 6, 1–13.
49	Wang, Y.; Finn, C.; Qian, M.C. Impact of growing environment on Chickasaw blackberry (Rubus L.) aroma evaluated by gas chromatography olfactometry dilution analysis. J. Agric. Food Chem. 2005, 53, 3563–3571.
50	Setkova, L.; Risticevic, S.; Pawliszyn, J. Rapid headspace solid-phase microextraction-gas chromatographic-time-of-flight mass spectrometric method for qualitative profiling of ice wine volatile fraction I. Method development and optimization. J. Chromatogr. A 2007, 1147, 213–223.
51	Zaikin, V.G. Personal communication: Retention indices measured during 2010. 2010.
52	Cajka, T.; Riddellova, K.; Tomaniova, M.; Hajslova, J. Recognition of beer brand based on multivariate analysis of volatile fingerprint. J. Chromatogr. A 2010, 1217, 4195–4203, doi:10.1016/j.chroma.2009.12.049.
53	Pino, J.; Marbot, R.; Vázquez, C. Volatile components of the fruits of Vangueria madagascariensis J. F. Gmel. from Cuba. J. Essent. Oil Res. 2004, 16, 302–304.
54	Gauvin, A.; Lecomte, H.; Smadja, J. Comparative investigations of the essential oils of two scented geranium (Pelargonium spp.) cultivars grown on Reunion Island. Flavour Fragr. J. 2004, 19, 455–460.
55	Fang, Y.; Qian, M. Aroma compounds in Oregon Pinot Noir wine determined by aroma extract dilution analysis (AEDA). Flavour Fragr. J. 2005, 20, 22–29.
56	Rocha, S.M.; Freitas, R.; Cardoso, P.; Santos, M.; Martins, R.; Figueira, E. Exploring the potentialities of comprehensive two-dimensional gas chromatography coupled to time of flight mass spectrometry to distinguish bivalve species: comparison of two clam species (Venerupis decussata and Venerupis philippinarum). J. Chromatogr. A 2013, 1315, 152–161.
57	Salvador, Â.C.; Baptista, I.; Barros, A.S.; Gomes, N.C.M.; Cunha, Â.; Almeida, A.; Rocha, S.M. Can volatile organic metabolites be used to simultaneously assess microbial and mite contamination level in cereal grains and coffee beans? PLoS One 2013, 8, e59338.
58	Fan, W.; Qian, M.C. Identification of aroma compounds in Chinese “Yanghe Daqu” liquor by normal phase chromatography fractionation followed by gas chromatography/olfactometry. Flavour Fragr. J. 2006, 21, 333–342.
59	Shalit, M.; Katzir, N.; Tadmor, Y.; Larkov, O.; Burger, Y.; Shalekhet, F.; Lastochkin, E.; Ravid, U.; Amar, O.; Edelstein, M.; et al. Acetyl-CoA: Alcohol acetyltransferase activity and aroma formation in ripening melon fruits. J. Agric. Food Chem. 2001, 49, 794–799.
60	de Souza, P.P.; Cardeal, Z. de L.; Augusti, R.; Morrison, P.; Marriott, P.J. Determination of volatile compounds in Brazilian distilled cachaça by using comprehensive two-dimensional gas chromatography and effects of production pathways. J. Chromatogr. A 2009, 1216, 2881–2890.
61	Tret’yakov, K.V. Retention Data. NIST Mass Spectrometry Data Center. NIST Mass Spectrom. Data Cent. 2007.
62	Xie, J.; Sun, B.; Yu, M. Constituents of top fragrance from fresh flowers of Robinia Pseudoacacia L. occuring in China. Flavour Fragr. J. 2006, 21, 798–800.
63	Congiu, R.; Falconieri, D.; Marongiu, B.; Piras, A.; Porcedda, S. Extraction and isolation of Pistacia lentiscus L. essential oil by supercritical CO2. Flavour Fragr. J. 2002, 17, 239–244.
64	Boscaini, E.; Ruth, S. v.; Biasioli, F.; Gasperi, F.; Märk, T.D. Gas Chromatography − Olfactometry (GC-O) and Proton Transfer Reaction − Mass Spectrometry (PTR-MS) Analysis of the Flavor Profile of Grana Padano , Parmigiano Reggiano , and Grana Trentino Cheeses. J. Agric. Food Chem. 2003, 51, 1782–1790.
65	Verdier-Metz, I.; Coulon, J.-B.; Pradel, P.; Viallon, C.; Berdague, J.-L. Effect of forage conservation (hay or silage) and cow breed on the coagulation properties of milks and on the characteristics of ripened cheeses. J. Dairy Res. 1998, 65, 9–21.
66	Hofmann, T.; Schieberle, P. Identification of key aroma compounds generated from cysteine and carbohydrates under roasting conditions. Zeitschrift für Leb. und -forsch. A 1998, 207, 229–236.
[truncated: 15 more columns]
